# 1 An Adaptive Flagellar Photoresponse 2 Determines the Dynamics of 3 Accurate Phototactic Steering in 4 *Chlamydomonas*

5 **Kyriacos C Leptos<sup>1†\*</sup>, Maurizio Chioccoli<sup>1†§</sup>, Silvano Furlan<sup>1¶</sup>, Adriana I Pesci<sup>1</sup>,  
6 Raymond E Goldstein<sup>1\*</sup>**

**\*For correspondence:**

7 [K.Leptos@damtp.cam.ac.uk](mailto:K.Leptos@damtp.cam.ac.uk) (KCL);  
8 [R.E.Goldstein@damtp.cam.ac.uk](mailto:R.E.Goldstein@damtp.cam.ac.uk)  
(REG)

<sup>1</sup>Department of Applied Mathematics and Theoretical Physics, University of Cambridge,  
Wilberforce Road, Cambridge, CB3 0WA, UK

<sup>†</sup>These authors contributed equally<sup>9</sup>  
to this work

**Present address:** <sup>§</sup>Department of<sup>10</sup>  
Physics, University of Cambridge,<sup>11</sup>  
Thomson Avenue, Cambridge, CB3<sup>12</sup>  
0HE, UK; <sup>¶</sup>Sensing Electromagnetic  
Plus Corp., 2450 Embarcadero Way,<sup>13</sup>  
Palo Alto, CA-94303, USA<sup>14</sup>

**Abstract** Our understanding of phototaxis of biflagellates stems almost exclusively from the  
model alga *Chlamydomonas reinhardtii*, via studies of its flagella, light-sensor and steering. However,  
no comprehensive model linking all these aspects of its physiology and behavior has been  
constructed and tested experimentally. Here, we develop such a mathematical model by coupling  
an adaptive flagellar photoresponse to rigid-body dynamics tailored to details of flagellar beating,  
and corroborate it with experimental data – at the flagellar and tactic levels – to explain the  
accurate phototactic steering of this alga. We experimentally validate the hypothesized adaptive  
flagellar photoresponse using high spatio-temporal resolution methodology on immobilized cells,  
and corroborate the predicted reorientation dynamics of phototactic swimmers using 3D-tracking  
of free-swimming cells. Finally, we reconfirm, both theoretically and experimentally, that the  
adaptive nature of the response has peak fidelity at a frequency of about 1.6 Hz, corresponding to  
the rotation frequency of the cell body.

## 23 Introduction

24 Directional non-image-based phototaxis – the ability to change direction of motion in order to  
25 reorient with a light stimulus – abounds in motile eukaryotic microorganisms, unicellular and multi-  
26 cellular alike. From photosynthetic algae (**Bendix, 1960**) to early-stage larvae of marine zooplankton  
27 (**Thorson, 1964**), phototaxis is such a crucial behavioral response for the survival of these organisms  
28 that one is led to hypothesize that organisms must have evolved navigational strategies to reach  
29 their goal in a very efficient manner. Photosynthetic algae need to harvest light energy to support  
30 their metabolic activities, whereas animal larvae perform phototaxis so that their upward motion  
31 can enhance their dispersal.

32 One of the most intriguing features of non-image-based phototaxis is the ability to navigate  
33 towards (or away from) light without the presence of a central nervous system. One of the essential  
34 sensory components for directional phototaxis (also known as vectorial phototaxis), is a specialized  
35 sensor. This is possible in zooplanktonic larvae via a single rhabdomeric photoreceptor cell (**Jékely**  
36 **et al., 2008**) or in the case of motile photosynthetic micro-organisms such as volvoclean algae,  
37 a "light antenna" (**Foster and Smyth, 1980**), which was generally thought to co-localize with the  
38 cellular structure called the *eyespot*, a carotenoid-rich orange stigma. **Foster and Smyth (1980)**  
39 theorized that in order for vectorial phototaxis to work, the light antenna has to have directional

40 detection, i.e. detect light only on one side, and that the layers of carotenoid vesicles would act as  
 41 an interference reflector. This hypothesis was later verified in algae by experiments of eyespot-less  
 42 mutants that lacked the carotenoid vesicles, but could nevertheless do only negative phototaxis  
 43 (Ueki *et al.*, 2016). Their experiments concomitantly showed that the algal cell bodies can function  
 44 as convex lenses with refractive indices greater than that of water. For the sake of completeness,  
 45 it should be noted that in zooplankton the "shading" role of the carotenoid vesicles is filled by a  
 46 single shading pigment cell (Jékely *et al.*, 2008).

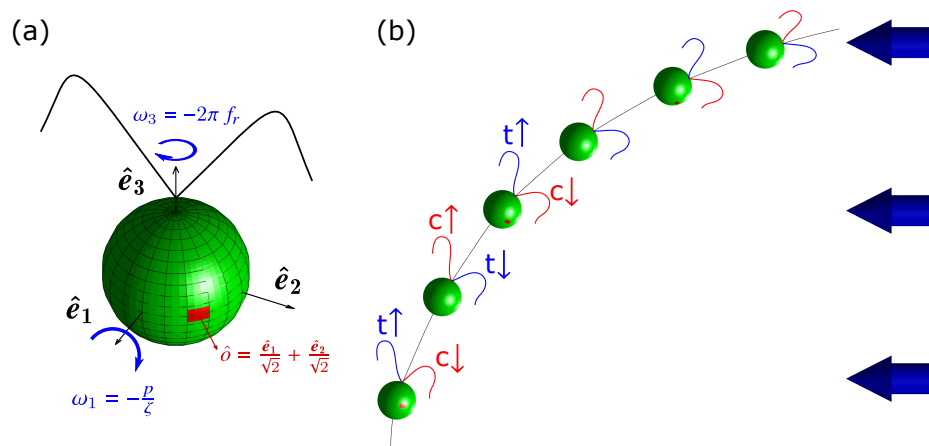

**Figure 1. Illustrations of the geometric model of a *Chlamydomonas* cell and of the two-phase model of phototactic activity leading to steering.** (a) The axes of the moving frame of the phototactic swimmer is shown, along with the position of the eyespot vector  $\hat{\delta}$ , shown in red, and found at  $45^\circ$  away from the flagellar beating plane spanned by  $\hat{e}_2\hat{e}_3$ . The angular velocities  $\omega_1$  and  $\omega_3$  are also shown with  $p$  being the photoresponse,  $\zeta$  a hydrodynamic constant and  $f_r$  the frequency of rotation of the cell body. (b) The two phases of phototactic activity responsible for the persistence of phototactic reorientation.  $t$  represents the *trans* (in blue) and  $c$  the *cis* flagellum (in red).

47 Among photosynthetic algae the biflagellate species *Chlamydomonas reinhardtii* has been the  
 48 most studied organism: it exhibits, along with its breast-stroke mode of propagation (Rüffer and  
 49 Nultsch, 1985) and left-handed helix rotation about its axis (Foster and Smyth, 1980), both positive  
 50 (towards light) and negative (away from light) phototactic responses (Witman *et al.*, 1993), as well as  
 51 a photoshock/avoidance response. The eyespot in this alga is found on the equator of the cell and  
 52 at  $45^\circ$  away from the plane of flagellar beating (Rüffer and Nultsch, 1985). It was in *Chlamydomonas*  
 53 that the molecular players mediating phototaxis, the two eyespot-localized photoreceptors, chan-  
 54 nelrhodopsins A and B, were discovered (Sineshchekov *et al.*, 2002). The discovery that these  
 55 proteins function as light-gated ion channels (Nagel *et al.*, 2002), constituted the initial unraveling  
 56 of Ariadne's thread regarding the signal transduction pathway of the photoresponse. Starting  
 57 instead in the center of this Minoan maze, Rüffer and Nultsch used high-speed cinematography to  
 58 study the flagellar photoresponse (1990, 1991), including the photoshock response (1995). With  
 59 their pioneering work on immobilized *Chlamydomonas* cells they showed, though using a negatively-  
 60 phototactic strain, that the *front amplitude* of the cells was likely to be responsible for the steering of  
 61 *Chlamydomonas* towards the light, and that phototaxis is a result of periodic irradiation and shading.  
 62 This result led to the first model for phototaxis (Schaller *et al.*, 1997) which divides the turning of  
 63 the cell into two phases (Figure 1b): *phase I*, in which the rotating eyespot moves from shade to  
 64 light, causing the flagellum farthest from the eyespot (the *trans* flagellum) to increase its amplitude  
 65 relative to the flagellum next to the eyespot (the *cis* flagellum), and *phase II*, in which the eyespot  
 66 moves from light to shade, leading to the two flagella acting in the opposite manner.

67 Significant contributions to the accurate measuring of flagellar photoresponse at a high temporal  
 68 resolution were made by Josef *et al.* (2005), who introduced a quadrature photodiode array, a device  
 69 whose analog signal could be digitized at up to 4000 samples per second. Moreover, this automated

70 method could capture longer time series than previous methods. Despite the limitations of this  
71 technology to capture the flagellar photoresponse at high spatial resolution, the authors were able  
72 to extract important information regarding flagellar beat-frequency and stroke-velocity.

73 In recent years, two types of models have sought to describe phototaxis: (i) numerical and  
74 theoretical models based on hydrodynamics and heuristic ciliary or flagellar response functions  
75 for ciliated larvae (Jékely *et al.*, 2008) and biflagellate algae (Bennett and Golestanian, 2015); (ii)  
76 theoretical adaptation-based models for the green alga *Volvox* (Drescher *et al.*, 2010), the multicell-  
77 ular "relative" of *Chlamydomonas*. In this study, we have developed a comprehensive mathematical  
78 adaptation-based model, in the spirit of Drescher *et al.* (2010) and incorporating information from  
79 Schaller *et al.* (1997) and Ruffer and Nultsch (1991), coupled to the dynamics of the yaw, pitch, and  
80 roll of a rigid body in order to describe the three-dimensional phototaxis of *Chlamydomonas* cells.  
81 Moreover, we have developed new experimental techniques for capturing the flagellar photore-  
82 sponse of immobilized cells at high spatio-temporal resolution and to 3D-track the trajectories  
83 of free-swimming phototactic cells. Using these techniques we have measured the time scales  
84 involved in photoresponse, adaptation and reorientation that theory dictates are necessary for  
85 accurate phototaxis.

## 86 Results

### 87 Capturing flagellar photoresponse and phototactic steering

88 The flagellar photoresponse of *Chlamydomonas reinhardtii* was captured at high spatio-temporal  
89 resolution using the experimental setup shown in Figure 2a. This setup builds on previous studies  
90 (Polin *et al.*, 2009; Drescher *et al.*, 2010; Leptos *et al.*, 2013) with the addition of a much smaller  
91 optical fiber ( $\varnothing 50 \mu\text{m}$ -core) to accommodate for the smaller size of a *Chlamydomonas* cell relative to  
92 a *Volvox* spheroid.

93 The experimental setup (Figure 2b) used for phototactic steering featured the following modifica-  
94 tions relative to its predecessor (Drescher *et al.*, 2009) – either engineered in-house or purchased –  
95 for ease and reproducibility: First, the sample chamber could be assembled by the user by clamping  
96 two acrylic flanges on a square glass tube in a watertight fashion to prevent leaks. The chamber  
97 design allowed a more accurate and easy calibration of the field of view and a simpler and better  
98 loading system of the sample via two barbed fittings. Furthermore, the new design of the chamber  
99 minimized sample contaminations during experiments. Second, the two 5-Megapixel cameras  
100 coupled to objectives with higher total magnification ( $\times 16$ ) and larger working distance at the same  
101 magnification (48 mm vs. 38 mm at  $\times 2$ ) were used to enhance the image performance.

### 102 Flagellar photoresponse is adaptive

103 We start by applying a step-up light stimulus. The ability to record the flagellar dynamics of  
104 *Chlamydomonas* cells, during light stimulation and at high spatio-temporal resolution, revealed  
105 many interesting and important features of the flagellar photoresponse upon a stimulus of this form.  
106 Firstly, it corroborated the fact that change in the waveform of the two flagella was in agreement with  
107 previous studies of high-speed cinematography (Ruffer and Nultsch, 1991), i.e. during a step-up  
108 response the front amplitude of the *trans* flagellum increases whereas the one of the *cis* flagellum  
109 decreases (Figure 3a-b). Secondly, it showed that the flagellar photoresponse is adaptive in nature  
110 (Figure 3c and Figure 3–Figure Supplement 2). For that reason we have employed a mathematical  
111 model, previously used to describe adaptive photoresponse in *Volvox* (Drescher *et al.*, 2010), that  
112 relates the adaptive photoresponse  $p$  to a hidden slow-decaying variable  $h$  by means of the ordinary  
113 differential equations (ODEs):

$$\tau_r \dot{p} = \eta s(t) - h - p \quad (1a)$$

$$\tau_a \dot{h} = \eta s(t) - h \quad (1b)$$

114 where  $s(t)$  is the photostimulus function and  $\eta$  is a factor with units reciprocal to  $s(t)$ . The hidden  
115 variable  $h$  reflects the internal biochemistry of the cell and is associated with a slower time scale  $\tau_a$

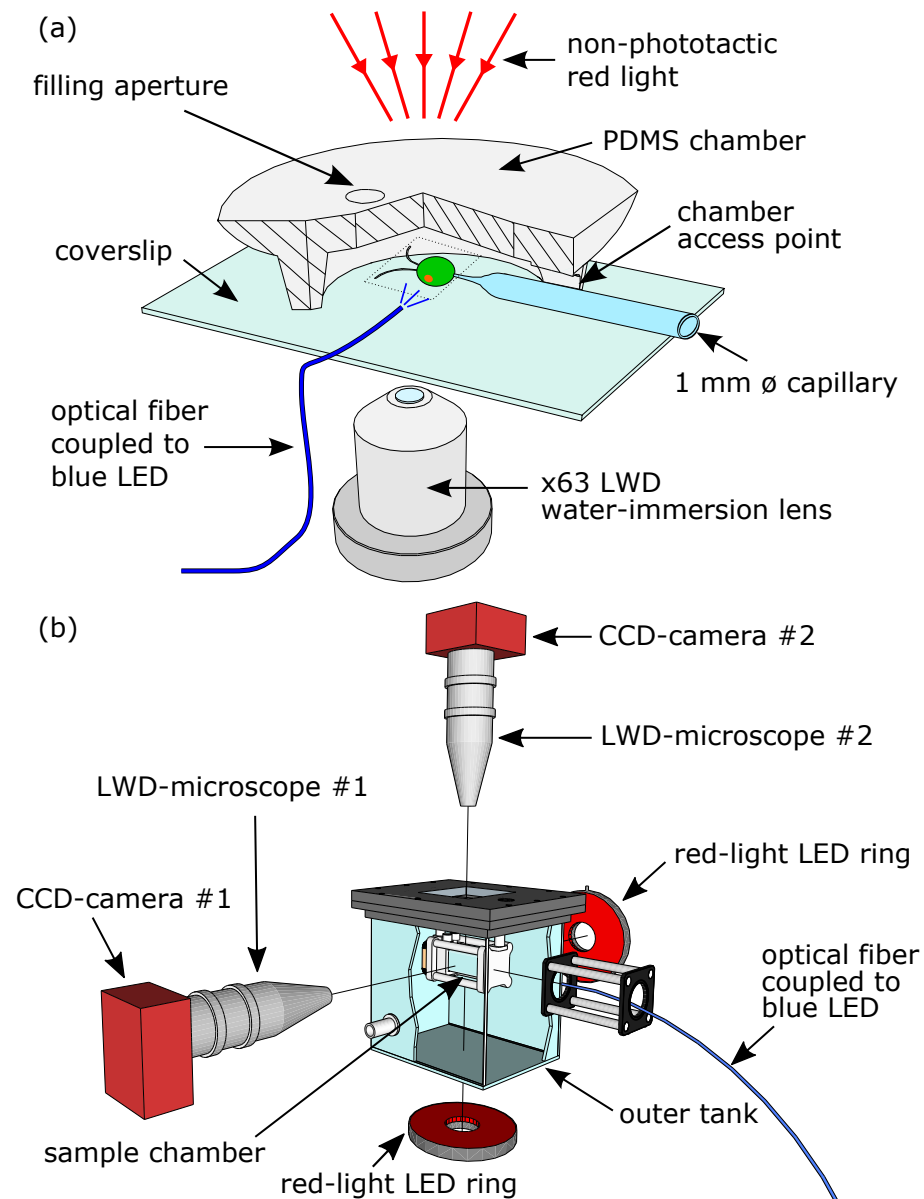

**Figure 2. Experimental setups.** (a) Experimental setup for measuring the flagellar photoresponse on immobilized cells, inside a PDMS chamber, using a micropipette pulled to a  $\varnothing 5\text{-}\mu\text{m}$  tip. In order to visualize the cell's beating flagella far from the coverslip, a x63 LWD objective lens was used. The blue LED used for light stimulation was coupled to a  $\varnothing 50\text{-}\mu\text{m}$  optical fiber. (b) Experimental setup for 3D-tracking phototactic free-swimming cells in a sample chamber immersed into an outer water tank for minimizing thermal convection. Imaging was performed using two aligned LWD microscopes, attached to two CCD cameras.

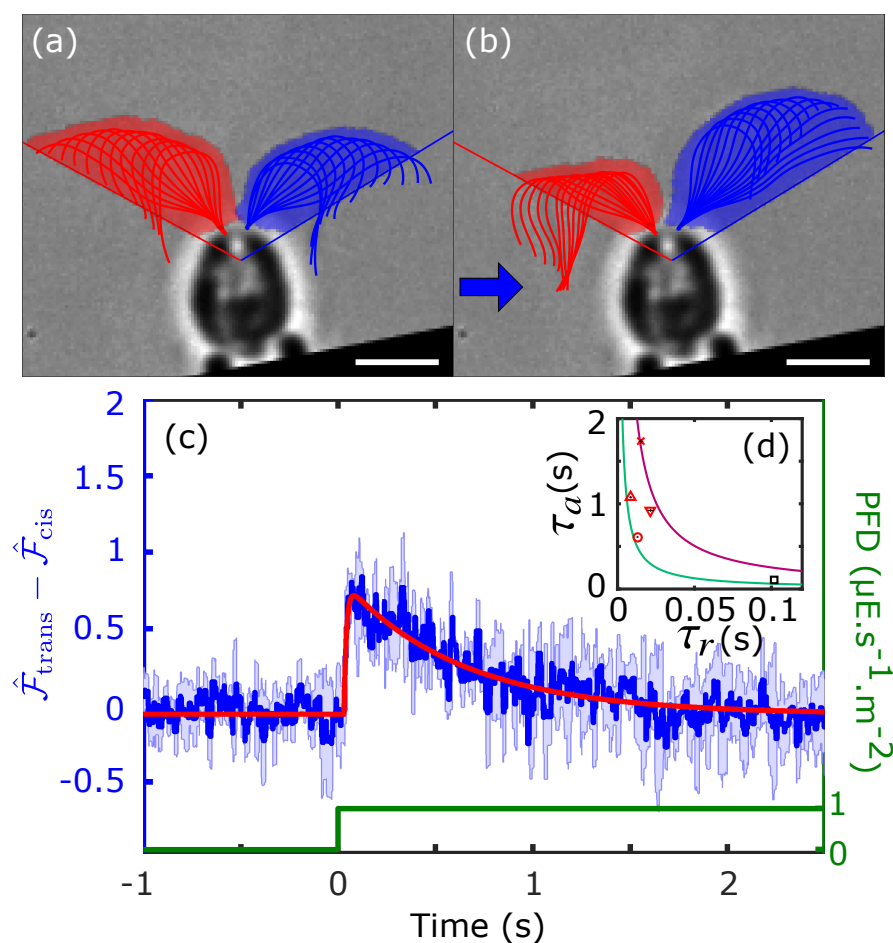

**Figure 3. Flagellar photoresponse of immobilized cells upon step-up light stimulation.** The raw front amplitudes  $\mathcal{F}_{\text{cis}}$  and  $\mathcal{F}_{\text{trans}}$  (shaded areas in red for *cis* and blue for *trans*) as defined in the text for each flagellum are shown (a) before and (b) right after the beginning of the photostimulus. The  $60^\circ$  reference lines are also shown. Direction of light is from the left (blue arrow). Scale bar is  $5\ \mu\text{m}$ . (c) The mean (dark blue line) and standard deviation (light-blue area) of photoresponse ( $\hat{F}_{\text{trans}} - \hat{F}_{\text{cis}}$ ) during a step-up stimulus for one cell ( $n_{\text{tech}} = 4$ ) fitted to **Equation 2** (red line). (d) Inset showing the mean (red markers) and standard deviation (black error bars) of fitted  $(\tau_r, \tau_a)$  pairs for  $n_{\text{cells}} = 4$  upon step-up stimulation. The  $(\tau_r, \tau_a)$  pair indicated with a black marker is derived from fitting the gain of the frequency response shown in **Figure 4a**. The hyperbolas for  $f_r^{\text{opt}} = 1$  Hz (red) and  $f_r^{\text{opt}} = 2$  Hz (green) are also shown.

**Figure 3-Figure supplement 1. Angle used to define the beginning and the end of a beat.** A chord is drawn from the base of each flagellum to a point of fixed length on the flagellum. The angles  $\Theta_{\text{cis}}$  and  $\Theta_{\text{trans}}$  between each of the chords (red for *cis* and blue for *trans* respectively) and the axis of symmetry of the cell (green), were used to define the duration of the flagellar beats. Scale bar is  $5\ \mu\text{m}$ .

**Figure 3-Figure supplement 2. Video showing flagellar photoresponse of immobilized cells upon step-up light stimulation.** The optical fiber is illustrated as a grey square that turns blue when stimulus light is turned on. The curves fitted to the *cis* and *trans* flagella are shown in red and blue respectively.

**Figure 3-Figure supplement 3. Beat frequency flagellar photoresponse.** The beat frequency response for the same cell as shown in **Figure 3c** averaged over  $n_{\text{tech}} = 4$  movies. The instantaneous beat frequency was calculated for each beat, ignoring beats that were out of synchrony. The mean and standard deviations of the instantaneous frequencies of the *cis* and *trans* flagella are shown in red and blue respectively.

116 (**Equation 1b**) than the fast response time scale  $\tau_r$  (**Equation 1a**). For a step-up stimulus  $s(t) = s_o H(t)$ ,  
 117 where  $H(t)$  is the Heaviside function and  $s_o$  is the intensity (flux density) of the light stimulus,  
 118 these equations can be solved in closed form. Furthermore the data revealed a time-delay of  
 119 photoresponse upon light stimulation, we therefore add a time delay  $t_d$  to this solution to obtain:

$$p_{\text{step}}(t) = \frac{\eta s_o}{1 - \rho} \left[ \exp\left(-\frac{(t - t_d)}{\tau_a}\right) - \exp\left(-\frac{(t - t_d)}{\tau_r}\right) \right] H(t - t_d) \quad (2)$$

120 where  $\rho = \tau_r/\tau_a$ . Experiments clearly show that  $\rho < 1$ .

121 We fit the photoresponse data to **Equation 2** to the dimensionless observable  $p = \hat{F}_{\text{trans}} - \hat{F}_{\text{cis}}$ ,  
 122 the difference of the *normalized* front amplitudes. The average front amplitude  $\bar{F}$  corresponding to  
 123 each unstimulated cell – used for normalization – was found to be in the range of 35-45  $\mu\text{m}^2$ . The  
 124 result of the fittings allowed us to extract values for  $(\tau_r, \tau_a)$  pairs, as shown in **Figure 3d**, with high  
 125 accuracy. In order to quantify how these values can affect the efficiency of the photoresponse of a  
 126 free swimming cell rotating around its central axis, we derived a mathematical relationship relating  
 127  $\tau_r$  and  $\tau_a$  to the frequency of an oscillating light stimulus  $f_s$  (see next section):

$$f_s^{\text{opt}} = \frac{1}{2\pi\sqrt{\tau_a\tau_r}} \quad (3)$$

128 Mathematically this corresponds to the value of  $f_s (= \omega_s/2\pi)$ , where the gain of rotational  
 129 frequency response  $\mathcal{R}(\omega_s)$  (described in **Equation 5**) is at its maximum. The relation in **Equation 3**  
 130 describes a curve (a hyperbola) of optimal  $(\tau_r, \tau_a)$  pairs for a given stimulus frequency  $f_s$  for an  
 131 immobilized cell, which can be considered equivalent to a rotational frequency  $f_r$  of a free-swimming  
 132 cell. As we see from **Figure 3d**, the mean values of fitted  $(\tau_r, \tau_a)$  pairs along with their standard  
 133 deviations, for the four cells analyzed, lie within the hyperbolas for  $f_r^{\text{opt}} = 1$  Hz (red) and  $f_r^{\text{opt}} = 2$  Hz  
 134 (green).

135 Another important feature of the step-up flagellar photoresponse is the time delay between  
 136 stimulus and response. As shown in **Figure 1a** the eyespot (represented by a red square on the  
 137 green sphere) is located at an angle  $\varphi = 45^\circ$  away from the plane of flagellar beating (located in the  
 138  $\hat{e}_2\hat{e}_3$  plane). This means that upon light stimulus the flagella of the cell need to be pointing to the  
 139 same direction as the eyespot for phototaxis to take place in an efficient manner. For that reason  
 140 we hypothesize that the flagellar response of the cell has been fine-tuned by natural selection to  
 141 have a delay such that the maximum photoresponse ( $p_{\text{max}}$ ) will occur after the cell has rotated by an  
 142 angle of  $\approx 45^\circ$  during its left-handed helix motion. According to **Equation 2** the time  $t_{\text{max}}$  at which  
 143  $p_{\text{max}}$  occurs is:

$$t_{\text{max}} = t_d - \frac{\tau_r}{1 - \rho} \ln \rho \quad (4)$$

144 Based on our data we compute  $t_{\text{max}}$  to be  $94 \pm 24$  ms ( $n = 4$ ), which corresponds to an  $f_r = 1.1$ -1.8  
 145 Hz, assuming a constant  $\varphi = 45^\circ$ , or to  $\varphi = 38 - 64^\circ$ , assuming a constant  $f_r^{\text{opt}} = 1.5$  Hz. The range of  
 146 values for  $f_r^{\text{opt}}$  are consistent with the locations of  $(\tau_r, \tau_a)$  pairs in **Figure 3d**.

### 147 **Flagellar photoresponse is fine-tuned with the frequency of rotation of cell body**

148 Cells were stimulated with oscillating light intensity for five different frequencies. If the adaptive  
 149 photoresponse model holds true, then there should be a maximum response at a resonant fre-  
 150 quency corresponding to the frequency of rotation of the cell  $f_r$ . This was shown in the past with  
 151 different techniques, both at the population level (**Yoshimura and Kamiya, 2001**) by measuring the  
 152 bulk photoreceptor current, and at the single cell-level by **Josef et al. (2006)**, for negative phototaxis  
 153 and at low spatial resolution. Here we show that this is true at the single cell level, for positive  
 154 phototaxis and at high spatial resolution, by directly measuring the flagellar photoresponse  $p$  as  
 155 defined in the previous section. The results from individual experiments (**Figure 4b-d**) immediately  
 156 revealed two major findings: (a) The flagellar photoresponse oscillates with the same frequency as  
 157 the frequency of the amplitude of the light-stimulus. This means that the response is linear and can

158 be described by the solution  $p_{\text{oscill}}$  (Equation 10 in *Materials and Methods*) of the governing equa-  
 159 tions (Equation 1a and Equation 1b), for an oscillating light stimulus  $s(t)$  (green line in Figure 4b-d).  
 160 (b) The amplitude of the observed  $p$  (blue line in Figure 4b-d) is higher at certain frequencies than  
 161 others.

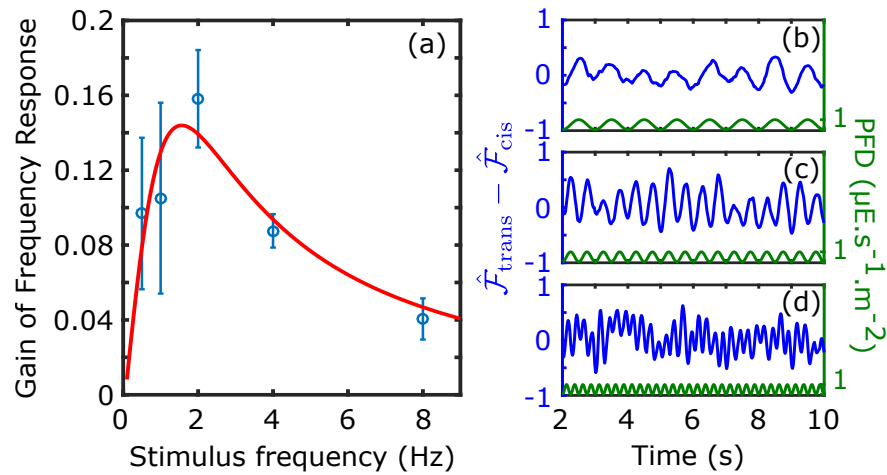

**Figure 4. Frequency response of immobilized cells stimulated with oscillating-amplitude light.** (a) The calculated gain of the frequency response (for positive phototaxis) for five stimulus frequencies (0.5, 1, 2, 4 and 8 Hz) for  $n_{\text{cells}} = 3$  (blue) fitted to Equation 5 (red line). The photoresponse ( $\hat{F}_{\text{trans}} - \hat{F}_{\text{cis}}$ ) shown (in blue) for three different stimulus frequencies (in green): 1 Hz (b), 2 Hz (c) and 4 Hz (d). The values of  $p$  for flagellar beats during instantaneous asynchronies were replaced by interpolated values based on neighbouring synchronous beats. The percentage of asynchronous beats during the time intervals shown were 7.6%, 10.6% and 35.3 % for (b), (c) and (d) respectively.

162 In order to investigate which of the five stimulus frequencies ( $f_s$ ) gives the most prominent  
 163 flagellar photoreponse  $p$  we first derived a relationship ( $\mathcal{R}$ ) between  $f_s (= \omega_s/2\pi)$  and the magnitude  
 164 of the Fourier transform of  $p_{\text{oscill}}$ . This is defined in Equation 11 of the *Materials and Methods*. The  
 165 result of the computation, which we refer to as the *gain of the frequency response*, is a function of  $\omega_s$ ;  
 166

$$\mathcal{R}(\omega_s) = \frac{\omega_s \tau_a}{\sqrt{(\omega_s^2 \tau_a^2 + 1) (\omega_s^2 \tau_r^2 + 1)}} \quad (5)$$

167 At the experimental level, we calculated the observed gain of the frequency response (blue in  
 168 Figure 4a), using a Discrete Fourier Transform on the observed  $p$ . The mean observed gain peaks  
 169 at 2 Hz. The data were fitted to Equation 5 giving  $\tau_r \approx \tau_a = 0.1$  s, which peaks at  $\approx 1.6$  Hz (red in  
 170 Figure 4a).

### 171 Model of phototactic swimmers in three dimensions

172 Naturally, the information gained from measuring the photoresponse of immobilized cells can be  
 173 used, initially at least, to get an estimate of the angular velocity  $\omega_1$  of the cell (Figure 1a) during  
 174 a phototactic turn. In particular, we would like to estimate the angle by which a free-swimming  
 175 cell – starting at a direction of  $90^\circ$  to the light source – would turn during the first half turn of  
 176 the rotation of the cell body about  $\hat{e}_3$  (Figure 1a). For pedagogical reasons we provide a more  
 177 detailed calculation of this estimate in Appendix 1 as motivation for the full mathematical model  
 178 that follows.

179 For this estimate we consider a simplified swimmer in Stokes flow. The swimmer is composed  
 180 of a spherical body of radius  $R$ , and two “flagella” in the shape of thin rods of length  $L$ . We compute  
 181 the total torque (Equation 16 in Appendix 1) generated by each of the two flagella – during the  
 182 effective stroke of the beat – to be  $\tau_{1,2} = (2/3)\zeta_{\perp} f_b a_{1,2} L^2$ , where  $f_b$  is the frequency of flagellar

283 beating,  $\zeta_{\perp}$  is the perpendicular viscous drag coefficient, and  $a_{1,2}$  is the amplitude of each flagellum.  
 284 This expression can also be related to the area swept by each flagellum  $\mathcal{A}_{1,2}$  (**Appendix 1-Figure 1**)  
 285 as  $\tau_{1,2} = (4/3)\zeta_{\perp}f_b\mathcal{A}_{1,2}L$ . The physical quantity that causes the cell to turn with angular velocity  $\omega_1$   
 286 about  $\hat{e}_1$  is the difference in the torques ( $\Delta\tau = \tau_1 - \tau_2$ ) generated by the two flagella, divided by the  
 287 rotational drag coefficient  $\zeta_r$ . Assuming that during a photoresponse the amplitude of flagellum 1  
 288 ( $a_1$ ) is equal to  $a + b$  and of flagellum 2 ( $a_2$ ) is equal to  $a - b$ , where  $b$  is the amplitude difference from  
 289 the unstimulated state  $a$ , then  $\omega_1 = -(\tau/\zeta_r)(2b/a)$ . We know that the flagellar amplitude oscillates if  
 290 it experiences an oscillating stimulus (**Figure 4c**) so if  $b(t) = 2b_o \sin(2\pi f_r t)$ , where  $2b_o$  is the maximum  
 291 flagellar amplitude difference and  $f_r$  is the frequency of rotation of the body of the cell, then

$$\omega_1(t) = -\frac{\tau}{\zeta_r} \frac{2}{a} b_o \sin(2\pi f_r t). \quad (6)$$

292 If we integrate **Equation 6** for the first half turn (HT) we will obtain the angle of phototactic turning  
 293 ( $\Phi_{\text{HT}}$ ) for that period of time during which  $b_o$  is assumed to be constant. The result of the integration  
 294 (**Appendix 1**) is

$$\Phi_{\text{HT}} = \frac{4}{3\pi} \frac{\zeta_{\perp}}{\zeta_r} \frac{f_b}{f_r} L^2 b_o. \quad (7)$$

295 If we substitute  $L = 10 \mu\text{m}$ ,  $b_o = 1 \mu\text{m}$ ,  $a = 5 \mu\text{m}$ ,  $\zeta_{\perp} = 2.6 \times 10^{-3} \text{ Pa}\cdot\text{s}$  (**Appendix 1**),  $\zeta_r = 3 \text{ pN}\cdot\mu\text{m}\cdot\text{s}$   
 296 (**Appendix 1**),  $f_b = 50\text{Hz}$  and  $f_r = 2\text{Hz}$  into **Equation 7** we find  $\Phi_{\text{HT}} \approx 0.9 \text{ rad} \approx 52^\circ$ . This means  
 297 that even with this oversimplified model of rod-shaped flagella, where the torque generated is  
 298 overestimated, it is possible for the phototactic swimmer to reorient with the light source (i.e. turn  
 299  $52^\circ$  about  $\hat{e}_1$ ) within half turn of cell-body rotation (i.e. a turn of  $180^\circ$  about  $\hat{e}_3$ ). Even though we do  
 300 not formally define the dimensionless variable  $p$  – used previously to describe the photoresponse –  
 301 in terms of the torques ( $\tau_{1,2}$ ) generated by the two flagella, we nevertheless proceed to utilize this  
 302 convenient variable to model the reorientation of the phototactic swimmers in three dimensions,  
 303 by defining  $\omega_1$  to be proportional to  $p$ .

304 The reorientation of phototactic swimmers – in three dimensions – can be described as a system  
 305 of five nonlinear ODEs expressing, in addition to that of  $p$  and  $h$  (**Equation 1a** and **Equation 1b**),  
 306 the time evolution of the three Euler angles of precession ( $\phi$ ), nutation ( $\theta$ ) and rotation ( $\psi$ ) (**Symon,**  
 307 **1971**). This is achieved by coupling the light stimulus  $s(t)$  with the amount of light received by the  
 308 eyespot as the cell turns and rotates. Moreover, the coupling of the Euler angle dynamics to the  
 309 photoresponse is achieved with the relation  $\omega_1 = -(1/\zeta)p$ , where  $\zeta$  is an effective viscosity, as shown  
 310 in **Figure 1a**. We postponed the detailed derivation to **Appendix 2**.

311 Using the assumption that the swimmer's U-turn lies in a plane (**Appendix 2**), we reduce the  
 312 problem to a system of three ODEs in which  $\phi + \pi/2$  describes the angle between the direction  
 313 of the swimmer and the direction of the light stimulus. Moreover, we non-dimensionalize the  
 314 equations by rescaling time to  $\tilde{t} = \omega_r t$ , where  $\omega_r = 2\pi f_r$  (**Appendix 2-Equations 19a-c**).

315 One of the most important features of phototaxis in *Chlamydomonas* is the separation of time  
 316 scales between the duration of individual flagellar beats ( $1/f_b \sim 0.02 \text{ s}$ ), the half-period of cell  
 317 body rotation ( $1/2f_r \sim 0.25 \text{ s}$ ) and the time for phototactic reorientation ( $\sim 2 \text{ s}$ ). As it takes many  
 318 half-periods of body rotation to execute a turn, we can consider the angle  $\phi$  that defines the  
 319 instantaneous angle between the cell body and the light direction to be approximately constant  
 320 during each half-period. Under this assumption, we may recast the phototactic dynamics as an  
 321 iterated map (**Figure 5** and **Figure 5-Figure Supplement 1**) for the quantity  $\Phi_n$ , defined to be the  
 322 Euler angle  $\phi$  at the end of each half-turn,

$$\Phi_{n+1} = \Phi_n + \xi_n \cos \Phi_n, \quad (8)$$

323 where  $\xi_n$  is defined in **Appendix 2-Equation 21** in terms of  $n$  and the fundamental parameters  
 324 ( $\tau_r, \tau_a, f_r, \zeta, s_o \eta$ ). With the angle  $\phi$  as defined above, we see that when a cell swims directly towards  
 325 the light,  $\Phi = \pi/2$ . One natural question is whether a cell can reach that orientation from any initial  
 326 condition in which the eyespot receives some light, corresponding to the initial angle  $\Phi_0$  lying in the



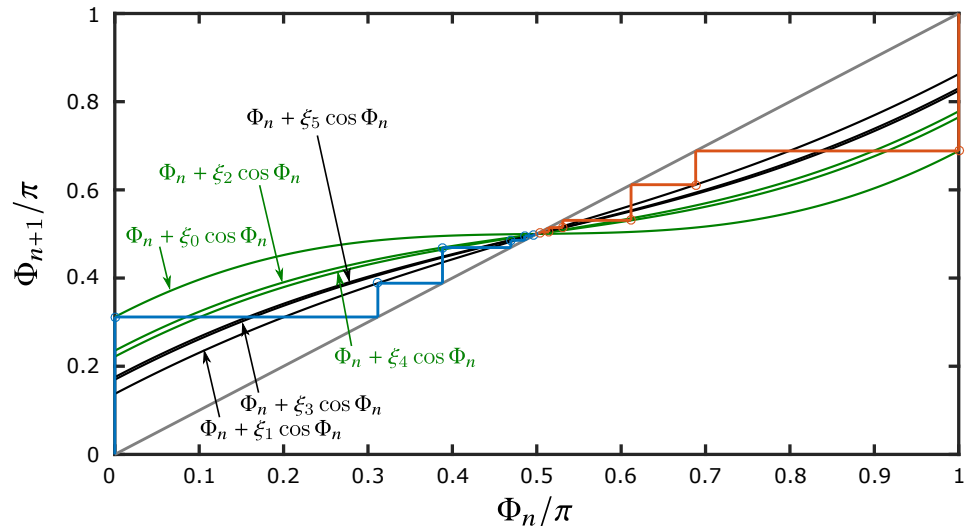

**Figure 5. Iterated map of the reorientation model.** The iterated map describes the dynamics of two cells, one with initial conditions  $\Phi_0 = 0$  (blue) and the other with initial conditions  $\Phi_0 = \pi$  (red), reorienting towards a fixed light source, as described by [Equation 8](#). The complete alignment with the light source is described by the fixed point at  $\pi/2$ . The function  $\Phi_{n+1} = \Phi_n + \xi_n \cos \Phi_n$  is shown for six half turns, i.e.  $0 \leq n \leq 5$ , with even numbers shown in green and odd numbers shown in black. The parameters defining  $\xi_n$  ( $\tau_r = 0.06$  s,  $f_r = 1.6$  Hz and  $\sigma/\zeta = 10$  s $^{-1}$ ) were chosen to be comparable to the experimental data, while the value  $\tau_a = 0.36$  s was chosen larger than in experiment in order to separate the individual curves to illustrate more clearly the nature of the map.

**Figure 5-Figure supplement 1. Animation of a solution of an iterated map.** Video animation of the reorientation dynamics – to  $\Phi_n = \pi/2$  – as shown in [Figure 5](#) for the cell with  $\Phi_0 = 0$ . The position of the vector  $\hat{e}_3$  is marked with a dashed line for every half turn. Time is displayed in numbers of full turns ( $i/2\pi$ ) and the interpolated Euler angle  $\phi$  is shown in units of  $\pi$  radians.

**Figure 5-Figure supplement 2. Phase diagram of the dynamics as defined by the values  $\xi_0$ .** The values of  $\xi_0$ , which are plotted as a function of  $\omega_r \tau_r$  and  $\omega_r \tau_a$ , determine the behavior of the iterated map. Numerically-calculated boundaries where  $\xi_0 = 1$  and  $\xi_0 = 2$  are shown in solid and dashed blue lines respectively. The two phase diagrams presented were generated using two different values of  $\sigma/\zeta$ : 9 s $^{-1}$  (a) and 15 s $^{-1}$  (b). Regions are labeled as S-M for stable monotonic, S-O for stable oscillatory and U-O for unstable oscillatory. The optimal (rescaled)  $\tau_r, \tau_a$  pairs – for immobilized cells – are shown as the black line  $\omega_r \tau_a = 1/(\omega_r \tau_r)$ . Red cross and orange ellipse in (a) summarize the mean and standard deviation of the experimental data on  $\tau_r, \tau_a$  pairs and  $f_r$  shown respectively in [Figure 6c](#) and [Figure 6-Figure Supplement 2a](#).

**Figure 5-Figure supplement 3. Optimal  $\tau_r, \tau_a$  pairs extracted from the 3D reorientation model** The optimal (rescaled)  $\tau_r, \tau_a$  pairs as extracted from the 3D reorientation model when  $\langle \xi \rangle = (\xi_0 + \xi_1)/2$  is at a maximum for a given  $f_r$  and  $\sigma/\zeta$ . The locus of these points is illustrated with three different fitted line segments which correspond to different values of  $f_r$ . The optimal rescaled  $\tau_r, \tau_a$  pairs – for immobilized cells – are shown as the black line  $\omega_r \tau_a = 1/(\omega_r \tau_r)$ .

227 range  $0 \leq \Phi_0 \leq \pi$ . In the usual manner of interpreting such iterated maps, if we choose  $\Phi_0 = 0$ , as in  
228 **Figure 5**, the angle  $\Phi_1$  after one half-turn is obtained by moving along the vertical blue line from the  
229 value  $\Phi_0$  on the horizontal axis until intersecting the green curve  $\Phi_n + \xi_0 \cos \Phi_n$ . Using  $\Phi_1$  so obtained  
230 for the next iteration is equivalent to reflecting the blue line off the grey diagonal up to the black  
231 curve  $\Phi_n + \xi_1 \cos \Phi_n$ , thus obtaining  $\Phi_2$ . Continuing this “cobwebbing”, we see the trajectory converge  
232 to  $\Phi = \pi/2$ , which is a stable fixed point. Choosing  $\Phi_0 = \pi$  leads to the cobwebbing trajectory shown  
233 in red, which also converges to  $\Phi = \pi/2$ . This serves as a simple, heuristic demonstration of the  
234 manner in which an adaptive photoresponse leads to robust phototaxis.

235 The rate of alignment of the swimming direction of the cell with respect to the light vector can  
236 be deduced by setting  $\Phi_n = \pi/2 - \Psi_n$ , where the angular deviation  $\Psi_n$  obeys  $\Psi_{n+1} = \Psi_n - \xi_n \sin \Psi_n \simeq$   
237  $(1 - \xi_n)\Psi_n$ , the latter relation holding for near-alignment ( $\Psi_n \ll 1$ ). Heuristically, we can ignore the  
238 small differences between the  $\xi_n$  and obtain the approximate solution  $\Psi_n \sim (1 - \xi_0)^n \Psi_0$ , which shows  
239 that the magnitude of  $\xi_0$  serves as a measure of the rate of reorientation of the cell; if  $0 < \xi_0 < 1$  the  
240 approach is monotonic, if  $1 < \xi_0 < 2$  it is oscillatory but stable, and if  $\xi_0 > 2$  the reorientation does  
241 not occur – the aligned state is unstable (and oscillatory). **Figure 5–Figure Supplement 2** shows  
242 these different regimes in the parameters space of  $\tau_r$  and  $\tau_a$  for two different values of the prefactor  
243  $\sigma/\zeta$ , along with the relation  $(\omega_r \tau_a)(\omega_r \tau_r) = 1$  of **Equation 3**, which defines the optimum response of  
244 immobilized cells. **Figure 5–Figure Supplement 3** shows a comparison between the latter and the  
245 results of optimizing the 3D-reorientation rate by maximizing the average  $\langle \xi \rangle = (\xi_0 + \xi_1)/2$  and we  
246 see the two approaches lead to remarkably similar results.

### 247 **Three-dimensional trajectories yield optimized photoresponse parameters**

248 Within the  $M = 6$  pairs of recorded movies, we tracked 283 trajectories with durations greater  
249 than 10 s and which included the trigger frame. From those, 44 showed both positive phototaxis  
250 and included a full turn to  $\Omega = \pi$  as shown in **Figure 6a** and **Figure 6–Figure Supplement 1**. These  
251 three-dimensional trajectories were cropped to any points for which  $\pi/2 \leq \Omega \leq \pi$  and which could  
252 then be fitted to **Equation 8**, using the relation  $\Omega = \Phi + \pi/2$ , as shown in **Figure 6b**. Out of these, 21  
253 trajectories had good fits (see Methods section for criterion) and the estimated four parameters ( $\tau_r$ ,  
254  $\tau_a$ ,  $f_r = \omega_r/2\pi$  and  $\mu = \sigma/\zeta$ ) in  $\xi_n$  (**Equation 21**) converged to a sufficiently narrow range of values.  
255 More specifically, pairs of the means of fitted  $\tau_r$  and  $\tau_a$  (**Figure 6c**) fall within the values of optimal  
256 response and adaptation time scales as described by **Equation 3**, mostly between the hyperbolas  
257  $f_r^{\text{opt}} = 1.5$  Hz (blue line) and  $f_r^{\text{opt}} = 2$  Hz (green line). The distributions of the means of fitted values  
258 for the other two parameters  $f_r$  and  $\mu$  are shown in **Figure 6–Figure Supplement 2a** and **Figure 6–**  
259 **Figure Supplement 2d** respectively. The median value for the fitted rotational frequency of the cell  
260 ( $f_r$ ) was found to be 1.78 Hz, in strong agreement with the maximum value of the fitted gain of  
261 frequency response in **Figure 4a**. Parameter  $\mu$  had a median value of  $8.98 \text{ s}^{-1}$  and it was found to  
262 be independent for the two different light intensities used. Finally, if we perform a global average of  
263 the values for  $f_r$ ,  $\tau_r$ , and  $\tau_a$  for the data shown in **Figure 6c** we can locate it on the stability diagram  
264 in **Figure 5–Figure Supplement 2a**, where we see that *Chlamydomonas* operates very close to the  
265 optimum photoresponse curve, well within the stable-monotonic regime of alignment.

### 266 **Discussion**

267 This study has achieved three major goals: the development of modern methods to capture flagellar  
268 photoresponse at high spatio-temporal resolution, the measurement of important biochemical  
269 time scales for the understanding of phototaxis and lastly the integration of the above information  
270 through the development of a biochemistry-based model to accurately describe the phototactic  
271 behavior of *Chlamydomonas* in terms of the dynamics of reorientation to the light source in three  
272 dimensions.

273 In addition, this study has addressed issues relating to past observations: With respect to the  
274 lag time  $t_d$  of the photoresponse, we have measured a value of  $32 \pm 9$  ms ( $n = 4$ ), very similar to the  
275 value 30-40 ms observed by **Rüffer and Nultsch (1991)**. In addition, we argue that the maximum

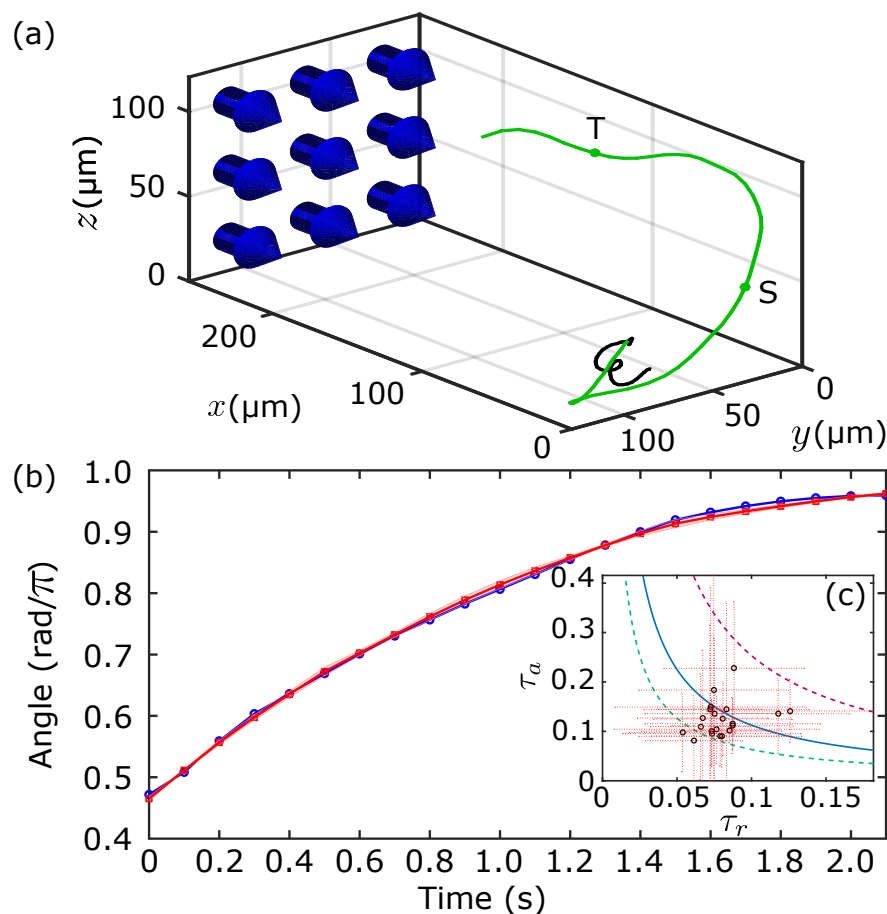

**Figure 6. Phototactic swimmers tracked in three-dimensions.** (a) The U-turn of a phototactic swimmer shown as acquired in the 3D-tracking apparatus. Trajectory in black indicates the time before light stimulation, whereas trajectory in green indicates after. Blue arrows indicate the direction of the light. The cropped trajectory used for fitting the reorientation dynamics (c) is bounded by the points from S to T. (b) The dynamics of the reorientation angle  $\Omega$  (in blue) for the cropped trajectory satisfying  $\pi/2 \leq \Omega \leq \pi$  (shown in (a) from S to T) fitted by a set of curves (mean and standard deviation in red) described by the iterated map in **Equation 8**, for a convergent range of parameters. (c) Inset showing the means (black markers) of fitted  $\tau_r$ ,  $\tau_a$  pairs (standard deviations in red), plotted along the hyperbolas for  $f_r^{\text{opt}} = 1$  Hz (red line), 1.5 Hz (blue line) and 2 Hz (green line).

**Figure 6-Figure supplement 1. Video of a phototactic swimmer with angle of reorientation.** The U-turn of a phototactic swimmer shown in a video with the angle of reorientation plotted below in real time. The colors of the points on the trajectory of the cell before (black) and after (green) the light is on ( $t = 0$ ) are reflected in the color of the markers on the plot below.

**Figure 6-Figure supplement 2. Fitting parameter statistics.** (a) Distribution of the fitted rotational frequency with median = 1.78 Hz ( $n = 21$ ). (b) Distribution of the optimal rotational frequency, as defined by **Equation 3** and using the fitted  $\tau_r$  and  $\tau_a$  pairs as shown in **Figure 6c**, with median = 1.61 Hz ( $n = 21$ ). (c) Linear correlation between fitted  $f_r$  (from (a)) and optimal  $f_r$  (from (b)), shown as a fitted straight line (blue) of the form  $f_r^{\text{opt}} = 0.62 f_r^{\text{fit}} + 0.52$ . (d) Distribution of the fitted reorientation constant  $\mu$  with median =  $8.98 \text{ s}^{-1}$  ( $n = 21$ ).

276 flagellar response would take place at  $t_{\max}$  as shown in **Equation 4**, which adds a correction factor  
277 to  $t_d$ . This is important when assessing the efficiency of the response with respect to the frequency  
278 of rotation of the cell body.

279 Regarding the amount of light necessary for a flagellar photoresponse with a positive sign,  
280 we have converged, through trial and error, to  $\approx 1 \mu\text{E}\cdot\text{s}^{-1}\cdot\text{m}^{-2}$  at a wavelength of 470 nm. This  
281 value is much lower than in other photoresponse experiments (*Josef et al., 2005*) where  $\approx 60$   
282  $\mu\text{E}\cdot\text{s}^{-1}\cdot\text{m}^{-2}$  were used at a longer wavelength (543 nm). This is consistent with the sensitivity  
283 profile of channelrhodopsin-2 (*Sineshchekov et al., 2002*). More detailed studies on the wavelength  
284 sensitivity of the flagellar photoresponse should be carried out in order to reveal any possible  
285 wavelength dependencies on  $\tau_r$ ,  $\tau_a$  or  $\eta$ .

286 Our experimental results – coming from different methodologies – show either directly, from  
287 the gain of flagellar photoresponse under stimuli of different oscillatory frequencies (**Figure 4a**)  
288 or indirectly, from the estimated values of  $\tau_r$  and  $\tau_a$  (**Figure 3d**, **Figure 6c** and **Figure 6–Figure**  
289 **Supplement 2ab**), that cells with rotational frequency in the range of  $\approx 1$ -2 Hz would have the most  
290 optimal response.

291 The optimality of the sensitivity of the photoresponse was first addressed by *Yoshimura and*  
292 *Kamiya (2001)*, using a paralyzed-flagella mutant strain (*pf14*) and an electrophysiological approach  
293 on a bulk sample. In their experiments, a suspension of immotile cells was exposed to an oscil-  
294 lating light stimulus (500 nm) and the resulting photoreceptor current was measured in a cuvette  
295 attached to two platinum electrodes. The experiment using relatively high light intensities observed  
296 a frequency response peak of 1.6 Hz when stimulated with  $\approx 160 \mu\text{E}\cdot\text{s}^{-1}\cdot\text{m}^{-2}$  and a frequency  
297 response peak of 3.1 Hz when stimulated with  $\approx 40 \mu\text{E}\cdot\text{s}^{-1}\cdot\text{m}^{-2}$ . The former observation is in perfect  
298 agreement with our results in **Figure 4a** and in **Figure 6–Figure Supplement 2ab** even though we  
299 used light stimulus intensities of  $\approx 1 \mu\text{E}\cdot\text{s}^{-1}\cdot\text{m}^{-2}$  and  $\approx 5$ -10  $\mu\text{E}\cdot\text{s}^{-1}\cdot\text{m}^{-2}$  respectively. We have not  
300 seen any evidence of cells having flagellar photoresponse dynamics that would corroborate the  
301 latter result of 3.1 Hz and this is a matter open to further investigation.

302 Further studies on the optimality of the sensitivity of the photoresponse at the flagellar level  
303 were first carried out by *Josef et al. (2006)* on single cells of a negatively phototactic strain. The  
304 usage of the quadrature photodiode to measure stroke velocity was vital to the automation of the  
305 methodology, nevertheless it gave the magnitude of the velocity component parallel to the body  
306 axis only and at a particular position. In this study, it is the first time that the optimality of the  
307 photoresponse's sensitivity is shown in a wild-type strain performing positive phototaxis, both at  
308 the flagellar level and at high spatio-temporal resolution, digitally capturing the full waveform of  
309 the response.

310 Moreover, this study addressed the relationship of stimulus  $s$  to the photoresponse of *Chlamy-*  
311 *domonas p* using differential equations and a handful of parameters such as  $\tau_r$  and  $\tau_a$  corresponding  
312 to physical processes. Attempts to derive similar relationships between stimulus and photore-  
313 sponse (*Josef et al., 2006*) used linear system analysis. The result of such a signal-processing  
314 oriented method, usually includes a much larger number of estimated parameters necessary for  
315 the description of the system – without necessarily corresponding to any obvious physical quantities  
316 that can be easily measured.

317 With respect to the range of values observed for  $\tau_a$  and  $\tau_r$ , they lie in the low- $\tau_r$ /high- $\tau_a$  region  
318 for step-up, mid- $\tau_r$ /mid- $\tau_a$  region for 3D-tracking and high- $\tau_r$ /low- $\tau_a$  region for rotational frequency  
319 response experiment. Possible explanations for these observations have to do with the dependence  
320 on the intensity of the stimulus (blue) light as well as the interference from the intensity of the  
321 background (red) light. It is worthy of commenting that the amount of background light in the  
322 immobilized high-resolution experiments is many orders of magnitude higher than the 3D-tracking  
323 experiments, and it could very well play a role to the above observations.

324 The development of a comprehensive mathematical model linking physiology to behavior  
325 presents a platform begging for future perturbation-based experiments in order to dissect the  
326 mechanism of phototaxis and extend our biological knowledge of the system. The implementation

327 of such a detailed model will require the discovery of many more currently unknown relations  
328 between variables, not just for the sake of completeness, but for exploring emerging mechanisms  
329 of physiological importance. One such an example is the physiological importance of the parameter  
330 of proportionality ( $\eta$ ) between  $p$  and  $s$  (**Equation 1a**) as a measure of phototactic efficiency and  
331 phototactic sign, and its dependence on the intensity of the light stimulus.

332 Flagellar photoresponse – and by extension phototaxis – appears to be a very complex biological  
333 process encompassing many variables, as mentioned above. This is evident from the fact that  
334 experiments exhibited a high level of difficulty regarding multiple measurements on the same cells  
335 of elicited positive photoresponse. This has to do with our lack of understanding of long-term  
336 adaptation to darkness or phototactic light for that matter, topics that only recently have begun to  
337 be addressed (*Arrieta et al., 2017*).

338 It is noteworthy to remark that a biochemistry-based model can explain the experimentally  
339 observed dynamics of phototactic reorientation in three-dimensions, in the absence of an explicit  
340 hydrodynamic model, and with  $\omega_1 = -(1/\zeta)p$  being sufficient. Although it is evident that the torque  
341 generated by each flagellum is connected to the total swept area ( $\mathcal{A}$ ) as in **Equation 16 (Appendix**  
342 **1)** or to the front amplitudes ( $\mathcal{F}$ ) as in the experiments, and that successive differences in the  
343 corresponding flagellar torques are responsible for  $\omega_1$ , a more detailed model where biochemistry  
344 is coupled to mechanical forces would be the subject of a further study. One example of improving  
345 the model could be the investigation of the dependence of flagellar torque to the flagellar beat fre-  
346 quency ( $f_b$ ) as shown in **Equation 16 (Appendix 1)**. We know from experiments that the frequency of  
347 flagellar beat does not change significantly during the photoresponse experiments on immobilized  
348 cells (**Figure 3–Figure Supplement 3** showing the cell with the most change to be  $\lesssim 10\%$ ), but not  
349 necessarily for free-swimming cells. Another example of including more detailed hydrodynamics,  
350 would be the formal definition of  $1/\zeta$ , the proportionality constant between  $\omega_1$  and  $p$ . Interestingly  
351 from the fitted parameter  $\mu (= \sigma/\zeta$  in **Equation 21**), we know that the product between  $\sigma$  and  $1/\zeta$   
352 is of order 10 (median value  $8.98 \text{ s}^{-1}$ ) and although we do not know the exact value of  $\sigma (= s_o\eta)$ ,  
353 we can estimate it to be in the range of  $4 < \sigma < 7$  based on the light intensities used. This allows  
354 us to place an estimate on  $1/\zeta$  in the range of  $1.3 < 1/\zeta < 2.3$ , and if we compare it to the relation  
355  $\omega_1 = -(\tau/\zeta_r)(2b/a)$  we can further relate it to the fluid mechanics via  $1/\zeta = \tau/\zeta_r \times \mathcal{F}/\mathcal{A} = 5.7 \text{ s}^{-1}$ ,  
356 where  $\mathcal{F}/\mathcal{A}$  is empirically found to be  $\approx 1/3.5$ . In this study, we declare this level of proximity,  
357 i.e. same order of magnitude, between observed and expected values of  $1/\zeta$ , a success, and we  
358 leave a more accurate estimate of this variable to future, more detailed hydrodynamic models that  
359 similarly link physiology to behavior.

## 360 **Methods and Materials**

361 This is a detailed description of the materials and methods used for both types of experiments with  
362 immobilized and free-swimming cells and their corresponding analyses.

### 363 **Culture conditions**

364 *Chlamydomonas* wild-type cells (strain CC125 (*Harris, 2009*)) were grown axenically under pho-  
365 toautotrophic conditions in minimal media (*Rochaix et al., 1988*), at  $23^\circ\text{C}$  under a  $100 \mu\text{E}\cdot\text{s}^{-1}\cdot\text{m}^{-2}$   
366 illumination in a 14:10 h light-dark cycle.

### 367 **Flagellar photoresponse of immobilized cells**

368 Cells were prepared as described previously (*Leptos et al., 2013*) – centrifuged, washed and gently-  
369 pipetted into a custom-made observation chamber made of polydimethylsiloxane (PDMS) as shown  
370 in **Figure 2a**. Chambers were mounted on a Nikon TE2000-U inverted microscope with a  $\times 63$  Plan-  
371 Apochromat water-immersion long-working-distance (LWD) objective lens (441470-9900; Carl Zeiss  
372 AG, Germany). Cells were immobilized via aspiration using a micropipette (B100-75-15; Sutter, USA)  
373 that was pulled to a  $\varnothing 5\text{-}\mu\text{m}$  tip, and the flagellar beating plane was aligned with the focal plane of  
374 the objective lens via a rotation-stage. Video microscopy of immobilized cells was performed using

375 a high-speed camera (Phantom v341; Vision Research, USA) by acquiring 15 s-movies at 2000 fps.  
 376 Cells were stimulated at exactly frame 2896 ( $\approx 1.45$  s into the recording) using a  $\varnothing 50$   $\mu\text{m}$ -core optical  
 377 fiber (FG050LGA; Thorlabs, USA) that was coupled to a 470 nm Light Emitting Diode (LED) (M470L3;  
 378 Thorlabs, USA) and was controlled via an LED driver (LEDD1B; Thorlabs, USA). The LED driver and  
 379 the high-speed camera were triggered through a data-acquisition card (NI PCIe-6343; National  
 380 Instruments, USA) using in-house programs written in LabVIEW 2013 (National Instruments, USA),  
 381 for both step- and frequency-response experiments. Calibration of the optical fiber was performed  
 382 as follows: A photodiode (DET110; Thorlabs, USA) was used to measure the total radiant power  $W$   
 383 emerging from the end of the optical fiber for a range of voltage output values (0-5 V) of the LED  
 384 driver. Subsequently, the two quantities were plotted and fitted to a power-law model which was  
 385 close to linear.

386 A stimulus of  $\approx 1 \mu\text{E}\cdot\text{s}^{-1}\cdot\text{m}^{-2}$  (at 470 nm) was empirically found to give the best results in terms  
 387 of reproducibility, sign, i.e. positive phototaxis, and quality of response, since we conjecture that the  
 388 cells could recover in time for the next round of stimulation. For the step response experiments,  
 389 biological replicates were  $n_{\text{cells}} = 4$  with corresponding technical replicates  $n_{\text{tech}} = \{4, 3, 2, 2\}$ . For the  
 390 frequency response experiments, biological replicates were  $n_{\text{cells}} = 3$  with each cell stimulated to  
 391 the following amplitude-varying frequencies: 0.5 Hz, 1 Hz, 2 Hz, 4 Hz and 8 Hz. Only the cells that  
 392 showed a positive sign of response for *all* 5 frequencies are presented here. This was hence the  
 393 most challenging aspect of the experimental process.

### 394 Analysis of flagellar photoresponse

395 High-speed movies were processed and flagellar features were extracted as described previously  
 396 (*Leptos et al., 2013*). The angle  $\Theta$  (*Figure 3–Figure Supplement 1*) between a flagellum chord (i.e. the  
 397 line connecting the base of the flagellum and a point at a fixed distance from the base) and the  
 398 axis of symmetry of the cell was used to define the duration of the flagellar beats. In particular, the  
 399 beginning and the end of the beat were defined by the local minima in a time-series of the angle  $\Theta$   
 400 (*Figure 3–Figure Supplement 1*). For every *in-phase* beat, the areas swept by the two flagella and  
 401 located above the two reference lines drawn at  $60^\circ$  from the cell's central axis (noted as  $\mathcal{F}_{\text{cis}}$  and  
 402  $\mathcal{F}_{\text{trans}}$ ) were measured. These are shown in *Figure 3a-b*, and were used as the front amplitudes for  
 403 each beat. Finally, the flagellar photoresponse was defined as the difference of normalized front  
 404 amplitudes, where the normalization factor was the average front amplitude for the corresponding  
 405 unstimulated cell. The front amplitude ( $\mathcal{F}$ ) of beats during instantaneous asynchronies were ignored  
 406 and the corresponding values at those points were interpolated.

407 The solution to the governing equations (*Equation 1a* and *Equation 1b*) for an oscillatory stimu-  
 408 lus with frequency  $f_s (= \omega_s/2\pi)$  such as

$$s_{\text{oscill}}(t) = s_o(1 - \cos(\omega_s t))/2 \quad (9)$$

409 can be written in closed form (for sufficiently large enough  $t$ ):

$$p_{\text{oscill}}(t) = \frac{\eta s_o}{2(1 + \alpha_s^2)(1 + \beta_s^2)(1 - \rho)} \left( -(\alpha_s^2 - \beta_s^2) \cos(\omega_s t) - (\alpha_s - \beta_s)(\alpha_s \beta_s - 1) \sin(\omega_s t) \right) \quad (10)$$

410 where

$$\alpha_s = \omega_s \tau_a \text{ and } \beta_s = \omega_s \tau_r.$$

411 The gain of frequency response is thus defined as the magnitude ratio

$$\mathcal{R}(\omega_s) = \frac{|\langle \tilde{p}_{\text{oscill}}(\omega), H(\omega) \rangle|}{|\langle \tilde{s}_{\text{oscill}}(\omega), H(\omega) \rangle|} \quad (11)$$

412 where  $\tilde{p}_{\text{oscill}}$  and  $\tilde{s}_{\text{oscill}}$  are the Fourier transforms of  $p_{\text{oscill}}$  and  $s_{\text{oscill}}$  respectively. Truncation for positive  
 413 frequencies is indicated by  $\langle \cdot, H(\omega) \rangle$ .

## 414 Phototaxis experiments of free-swimming cells

415 Three-dimensional tracking of phototactic cells was performed using the method described in  
416 *Drescher et al. (2009)* and shown in *Figure 2b*. The experimental setup comprised of a sample  
417 chamber suspended in an outer water tank to eliminate thermal convection. The sample chamber  
418 was composed of two acrylic flanges (machined in-house) that were clamped onto an open-ended  
419 square borosilicate glass tube (2 cm × 2 cm × 2.5 cm; Vetrospec Ltd, UK), in a watertight fashion. Two  
420 charge-coupled device (CCD) cameras (Prosilica GT750; Allied Vision Technologies, Germany) coupled  
421 with two InfiniProbe™ TS-160 (Infinity, USA) with Micro HM objectives at a total magnification of ×16.  
422 The source of phototactic stimulus was a 470 nm blue-light LED (M470F1; Thorlabs, USA) coupled to  
423 a solarization-resistant optical fiber (M22L01; Thorlabs, USA) attached to an in-house assembled  
424 fiber collimator that included a ∅12.7 mm plano-convex lens (LA1074-A; Thorlabs, USA). Calibration  
425 of the collimated optical fiber was performed similarly to the experiments with immobilized cells. In  
426 addition, the thickness of the walls of the outer water tank, the walls of the inner sample chamber  
427 and the water in between, were taken into account for the calibration.

428 The two CCD cameras and the blue-light LED used for the stimulus light were controlled using  
429 LabVIEW 2013 (National Instruments, USA) including the image acquisition driver NI-IMAQ (National  
430 Instruments, USA). The cameras were triggered and synchronized at a frame rate of 10 Hz via a data-  
431 acquisition device (NI USB 6212-BNC; National Instruments, USA). For every tracking experiment  
432 ( $M = 6$ ), two 300-frame movies were acquired (side and top) with the phototactic light triggered at  
433 frame 50 (5 s into the recording). The intensity of the blue-light stimulus was chosen to be 5 or 10  
434  $\mu\text{E} \cdot \text{s}^{-1} \cdot \text{m}^{-2}$ .

## 435 Analysis of three-dimensional tracks

436 To track the cells we used in-house tracking computer programs written in MATLAB as described in  
437 *Drescher et al. (2009)*. Briefly, for every pair of movies cells were tracked in the *side* and *top* movies  
438 corresponding to the  $xz$ -plane and in the  $xy$ -plane respectively. The two tracks were aligned based  
439 on their  $x$ -component to reconstruct the three-dimensional trajectories. The angle  $\Omega$  (*Figure 6b*)  
440 between the cell's directional vector and the light was then calculated for every time point. The post-  
441 stimulus sections of the trajectories were cropped to the interval  $\pi/2 \leq \Omega \leq \pi$ , which corresponds  
442 to the reorientation phase. Using the relation  $\Omega = \Phi + \pi/2$ , the cropped trajectories were fitted to  
443 *Equation 8* by estimating the following parameters  $\tau_r$ ,  $\tau_a$ ,  $f_r = \omega_r/2\pi$  and  $\mu = \sigma/\zeta$ . The deterministic  
444 Nelder-Mead simplex method was employed to minimize the residual sum of squares (*RSS*). In  
445 order to avoid parameter estimations associated with local minima, 3000 different initial-condition  
446 vectors of the form  $(\tau_r, \tau_a, f_r, \mu)^{\text{init}}$  were used for the fitting of each trajectory. These vectors were  
447 constructed using all possible permutations from the following sets:  $\tau_r^{\text{init}} = \{0.01 + 0.01n : 0 \leq n \leq 9\}$ ,  
448  $\tau_a^{\text{init}} = \{0.1 + 0.1n : 0 \leq n \leq 9\}$ ,  $f_r^{\text{init}} = \{1 + 0.5n : 0 \leq n \leq 4\}$  and  $\mu^{\text{init}} = \{5 + n : 0 \leq n \leq 5\}$  such that  
449  $(\tau_r, \tau_a, f_r, \mu)^{\text{init}} \in \tau_r^{\text{init}} \times \tau_a^{\text{init}} \times f_r^{\text{init}} \times \mu^{\text{init}}$ . The criterion of good fit was taken to be  $RSS < 0.03$  for at  
450 least 5% (i.e. 600) of the fitting attempts using different initial conditions.

## 451 Acknowledgments

452 We would like to thank Pierre A. Haas for very useful discussions regarding mathematical theory,  
453 advice on Euclidean geometry, and critical reading of the manuscript, Kirsty Y. Wan for sharing some  
454 initial code from previous work on flagellar tracking, David-Page Croft, Colin Hitch and Paul Mitton in  
455 the mechanical workshop at DAMTP for technical support, John Milton for support with electronics,  
456 also at DAMTP, and Ali Ghareeb for helping with the initial assembly of the fiber coupling apparatus.

## 457 References

- 458 **Arrieta J**, Barreira A, Chioccioli M, Polin M, Tuval I. Phototaxis beyond turning: persistent accumulation and  
459 response acclimation of the microalga *Chlamydomonas reinhardtii*. *Scientific Reports*. 2017 dec; 7(1):3447. doi:  
460 10.1038/s41598-017-03618-8.
- 461 **Bendix SW**, Phototaxis. Springer New York Botanical Garden Press; 1960. doi: 10.2307/4353612.

- 462 **Bennett RR**, Golestanian R. A steering mechanism for phototaxis in *Chlamydomonas*. *Journal of The Royal*  
463 *Society Interface*. 2015 mar; 12(104):20141164–20141164. doi: [10.1098/rsif.2014.1164](https://doi.org/10.1098/rsif.2014.1164).
- 464 **Drescher K**, Goldstein RE, Tuval I. Fidelity of adaptive phototaxis. *Proceedings of the National Academy of*  
465 *Sciences of the United States of America*. 2010 jun; 107(25):11171–11176. doi: [10.1073/pnas.1000901107](https://doi.org/10.1073/pnas.1000901107).
- 466 **Drescher K**, Leptos KC, Goldstein RE. How to track protists in three dimensions. *The Review of scientific*  
467 *instruments*. 2009 jan; 80(1):014301. doi: [10.1063/1.3053242](https://doi.org/10.1063/1.3053242).
- 468 **Foster KW**, Smyth RD. Light Antennas in phototactic algae. *Microbiological reviews*. 1980 dec; 44(4):572–630.
- 469 **Harris EH**. *The Chlamydomonas Sourcebook*. Oxford: Academic Press; 2009.
- 470 **Jékely G**, Colombelli J, Hausen H, Guy K, Stelzer E, Nédélec F, Arendt D. Mechanism of phototaxis in marine  
471 zooplankton. *Nature*. 2008 nov; 456(7220):395–9. doi: [10.1038/nature07590](https://doi.org/10.1038/nature07590).
- 472 **Josef K**, Saranak J, Foster KW. Ciliary behavior of a negatively phototactic *Chlamydomonas reinhardtii*. *Cell motility*  
473 *and the cytoskeleton*. 2005 jun; 61(2):97–111. doi: [10.1002/cm.20069](https://doi.org/10.1002/cm.20069).
- 474 **Josef K**, Saranak J, Foster KW. Linear systems analysis of the ciliary steering behavior associated with negative-  
475 phototaxis in *Chlamydomonas reinhardtii*. *Cell motility and the cytoskeleton*. 2006; 63(12):758–777. doi:  
476 [10.1002/cm.20158](https://doi.org/10.1002/cm.20158).
- 477 **Leptos KC**, Wan KY, Polin M, Tuval I, Pesci AI, Goldstein RE. Antiphase synchronization in a flagellar-dominance  
478 mutant of *Chlamydomonas*. *Physical review letters*. 2013 oct; 111(15):158101.
- 479 **Nagel G**, Ollig D, Fuhrmann M, Kateriya S, Musti AM, Bamberg E, Hegemann P. Channelrhodopsin-1: a light-gated  
480 proton channel in green algae. *Science (New York, NY)*. 2002 jun; 296(5577):2395–8. [http://www.ncbi.nlm.nih.](http://www.ncbi.nlm.nih.gov/pubmed/12089443)  
481 [gov/pubmed/12089443](http://www.ncbi.nlm.nih.gov/pubmed/12089443), doi: [10.1126/science.1072068](https://doi.org/10.1126/science.1072068).
- 482 **Pak OS**, Gao W, Wang J, Lauga E. High-speed propulsion of flexible nanowire motors: Theory and experiments.  
483 *Soft Matter*. 2011 sep; 7(18):8169. doi: [10.1039/c1sm05503h](https://doi.org/10.1039/c1sm05503h).
- 484 **Polin M**, Tuval I, Drescher K, Gollub JP, Goldstein RE. *Chlamydomonas* swims with two "gears" in a eukaryotic  
485 version of run-and-tumble locomotion. *Science (New York, NY)*. 2009 jul; 325(5939):487–90. doi: [10.1126/sci-](https://doi.org/10.1126/science.1172667)  
486 [ence.1172667](https://doi.org/10.1126/science.1172667).
- 487 **Rochaix JD**, Mayfield S, Goldschmidt-Clermont M, Erickson JM. Molecular biology of *Chlamydomonas*. In: Schaw  
488 CH, editor. *Plant molecular biology: a practical approach* Oxford: IRL Press; 1988.p. 253–275.
- 489 **Rüffer U**, Nultsch W. High-speed cinematographic analysis of the movement of *Chlamydomonas*. *Cell Motility*.  
490 1985 feb; 5(3):251–263. <http://doi.wiley.com/10.1002/cm.970050307>, doi: [10.1002/cm.970050307](https://doi.org/10.1002/cm.970050307).
- 491 **Rüffer U**, Nultsch W. Flagellar photoresponses of *Chlamydomonas* cells held on micropipettes. III. Shock  
492 responses *Bot Acta*. 1995; .
- 493 **Rüffer U**, Nultsch W. Flagellar photoresponses of *Chlamydomonas* cells held on micropipettes: I. Change in  
494 flagellar beat frequency. *Cell Motility and the Cytoskeleton*. 1990; 15(3):162–167. [http://www3.interscience.](http://www3.interscience.wiley.com/journal/109910604/abstract)  
495 [wiley.com/journal/109910604/abstract](http://www3.interscience.wiley.com/journal/109910604/abstract), doi: [10.1002/cm.970150305](https://doi.org/10.1002/cm.970150305).
- 496 **Rüffer U**, Nultsch W. Flagellar photoresponses of *Chlamydomonas* cells held on micropipettes: II. Change in  
497 flagellar beat pattern. *Cell Motility and the Cytoskeleton*. 1991; 18(4):269–278. doi: [10.1002/cm.970180404](https://doi.org/10.1002/cm.970180404).
- 498 **Schaller K**, David R, Uhl R. How *Chlamydomonas* keeps track of the light once it has reached the right phototactic  
499 orientation. *Biophysical journal*. 1997; 73(3):1562–1572. doi: [10.1016/S0006-3495\(97\)78188-8](https://doi.org/10.1016/S0006-3495(97)78188-8).
- 500 **Sineshchekov OA**, Jung KH, Spudich JL. Two rhodopsins mediate phototaxis to low- and high-intensity light in  
501 *Chlamydomonas reinhardtii*. *Proceedings of the National Academy of Sciences of the United States of America*.  
502 2002; 99:8689–8694. doi: [12060707](https://doi.org/10.1073/pnas.120607099).
- 503 **Symon KR**. Chapter 11: The rotation of a rigid body. In: *Mechanics*, 3rd ed. Reading, MA: Addison-Wesley  
504 Publishing Company, Inc; 1971. p. 444–461.
- 505 **Thorson G**. Light as an ecological factor in the dispersal and settlement of larvae of marine bottom invertebrates.  
506 *Ophelia*. 1964 may; 1(1):167–208. doi: [10.1080/00785326.1964.10416277](https://doi.org/10.1080/00785326.1964.10416277).



- 507 **Ueki N**, Ide T, Mochiji S, Kobayashi Y, Tokutsu R, Ohnishi N, Yamaguchi K, Shigenobu S, Tanaka K, Minagawa J,  
508 Hisabori T, Hirono M, Wakabayashi Ki. Eyespot-dependent determination of the phototactic sign in *Chlamy-*  
509 *domonas reinhardtii*. Proceedings of the National Academy of Sciences. 2016 may; 113(19):5299–5304. doi:  
510 [10.1073/pnas.1525538113](https://doi.org/10.1073/pnas.1525538113).
- 511 **Witman GB**, Lefebvre PA, Ramanis Z, Luck DJL, Derguini F, Nakanishi K. *Chlamydomonas* phototaxis. Trends in  
512 cell biology. 1993 nov; 3(11):403–8. doi: 10.1016/0962-8924(93)90091-E.
- 513 **Yoshimura K**, Kamiya R. The sensitivity of *Chlamydomonas* photoreceptor is optimized for the frequency of cell  
514 body rotation. Plant and Cell Physiology. 2001 jun; 42(6):665–672. doi: 10.1093/pcp/pce084.

515 Appendix 1

516  
517  
518  
519  
520  
521  
522  
523  
524  
525  
526  
527  
528  
529  
530  
531  
532  
533  
534  
535  
536  
537  
538  
539  
540  
541  
542  
543  
544  
545  
546  
547

**Calculations used in estimating the angle of phototactic turning**  
**Derivation of time-averaged total torque generated by rod-shaped flagella**

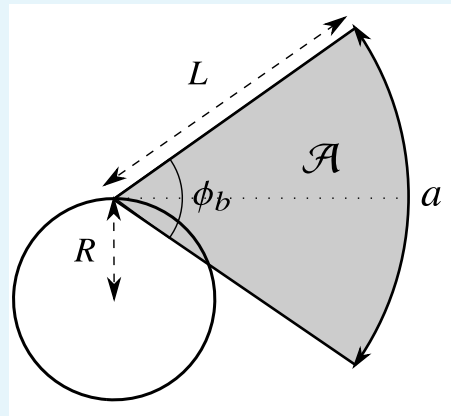

**Appendix 1 Figure 1. Model of the effective stroke of a simplified swimmer.** The total angle spanned by the rod-shaped flagella during an effective stroke is equal to  $\phi_b = a/L$  and the corresponding swept area (shaded) is  $\mathcal{A} = \frac{a^2}{2}$ .

In order to derive the amount of phototactic turning per half turn of cell rotation, we consider a swimmer in Stokes flow with a spherical body of radius  $R$ , bearing two rod-shaped flagella of length  $L$  attached at the anterior of the cell body, as shown in **Appendix 1-Figure 1**. The swimmer is immersed in a fluid with viscosity  $\eta$ . Furthermore, the swimmer flaps its rod-shaped flagella with a maximum velocity at the tip equal to

$$u_{\text{tip}} = \frac{a}{t_b} \quad (12)$$

where  $a$  is the amplitude of the beat and  $t_b$  is the duration of the effective stroke of the beat. We can thus assign each flagellum a force-density function depending on the position  $\lambda$  along the flagellum:

$$f(\lambda) = \zeta_{\perp} u(\lambda) = \zeta_{\perp} \frac{\lambda}{L} u_{\text{tip}} = \zeta_{\perp} \frac{\lambda}{L} \frac{a}{t_b}, \quad (13)$$

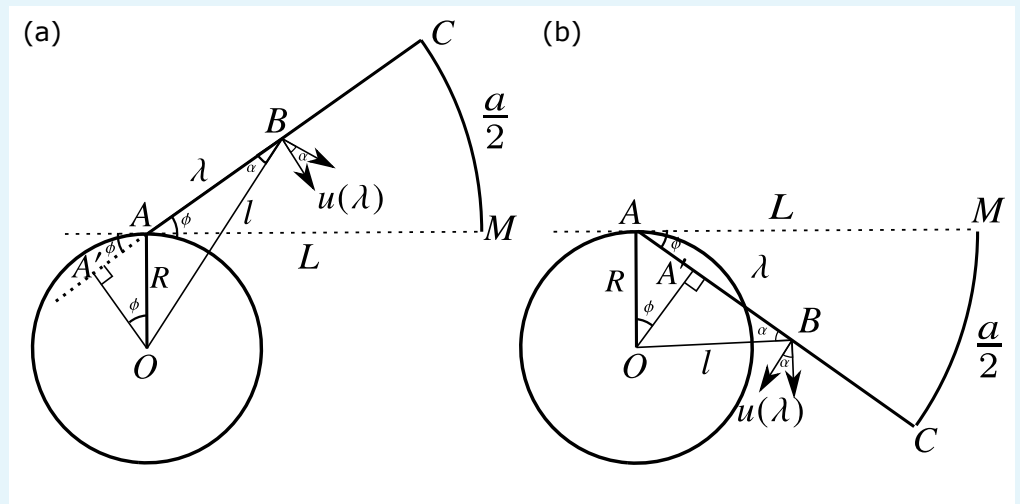

**Appendix 1 Figure 2. Geometric proof of the torque generated by a point on the rod-shaped flagellum.** The proof is broken down in two parts: (a) for angles of  $\phi$  above the tangent  $AM$  to the cell body (front amplitude) and (b) for angles of  $\phi$  below the same line (back amplitude).

The corresponding torque density, according to the geometric proof shown in **Appendix 1-Figure 2a**, for the front amplitude is

$$\tau_F(\lambda) = f(\lambda) \cos \alpha l = \frac{\zeta_{\perp} a}{L t_b} \lambda (\lambda + R \sin \phi)$$

where  $OA = R$ ,  $AC = AM = L$ ,  $AB = \lambda$ ,  $OB = l$  and  $l \cos \alpha = BA' = AB + AA' = \lambda + R \sin \phi$ .

548  
549  
550  
551  
552  
553  
554  
555  
556  
557  
558

559  
560  
561  
562  
563  
564  
566  
567  
568  
569  
570  
572  
573  
574  
575  
576  
577  
578  
579  
580  
581  
  
582  
583  
584  
585  
586  
587  
588  
590  
591  
592  
593  
594  
  
595  
596  
597  
598  
599  
600  
601  
602  
603  
604  
605  
606  
607  
608

The corresponding torque density, according to the geometric proof shown in **Appendix 1-Figure 2b**, for the back amplitude is

$$\tau_B(\lambda) = f(\lambda) \cos \alpha l = \frac{\zeta_{\perp} a}{L t_b} \lambda (\lambda - R \sin \phi)$$

where  $OA = R$ ,  $AC = AM = L$ ,  $AB = \lambda$ ,  $OB = l$  and  $l \cos \alpha = BA' = AB - AA' = \lambda - R \sin \phi$ .

The torque density functions are also functions of  $t$ , as  $\phi$  is a function of  $t$ . We define  $\phi(t) = \frac{\phi_b}{2} - \omega_b t$  for  $0 \leq t \leq t_b$ , where  $\omega_b = \frac{a}{L t_b}$ . Thus  $\tau_F$  and  $\tau_B$  can be combined and rewritten as

$$\tau(\lambda, t) = \zeta_{\perp} \omega_b \lambda \left( \lambda + R \sin \left( \frac{\phi_b}{2} - \omega_b t \right) \right) \quad (14)$$

Then the time-averaged total torque generated by a flagellum during the effective stroke of the beat is equal to

$$\tau = \frac{1}{t_b} \int_0^{t_b} \int_0^L \tau(\lambda, t) d\lambda dt \quad (15)$$

Performing the computation yields

$$\tau = \frac{2}{3} \zeta_{\perp} f_b a L^2 = \frac{4}{3} \zeta_{\perp} f_b \mathcal{A} L, \quad (16)$$

where  $t_b = 1/2f_b$  and  $f_b$  is the frequency of beating, and  $\mathcal{A} = aL/2$  is the area of the circular sector swept by the flagellum.

### Estimate of perpendicular drag coefficient

Using the definition of  $\zeta_{\perp}$  described in **Pak et al. (2011)**

$$\zeta_{\perp} = \frac{4\pi\eta}{\log\left(\frac{2L}{d}\right) + \frac{1}{2}} \approx 2.6 \times 10^{-3} \text{ Pa}\cdot\text{s}$$

using  $d = 0.25 \mu\text{m}$  for the diameter of the flagellum and  $\eta = 10^{-3} \text{ Pa}\cdot\text{s}$  as the viscosity of the fluid.

### Estimate of rotational drag coefficient

Using the values above for  $a$  and  $\eta$  we calculate  $\zeta_r$  to be

$$\zeta_r = 8\pi\eta a^3 = 3 \text{ pN}\cdot\mu\text{m}\cdot\text{s}.$$

### Integration of oscillating angular velocity

We would like to estimate the angle by which the cell turns – about its  $\hat{e}_1$  axis – for the duration of half a turn about its  $\hat{e}_3$  axis, while its angular velocity  $\omega_1$  oscillates as shown in **Equation 6**. It is reasonable to assume that the difference in flagellar amplitude between the two flagella ( $2b$ ), on which  $\omega_1$  depends, oscillates with constant amplitude ( $2b_o$ ) during the period of half a turn. Then we can compute the angle turned about  $\hat{e}_1$  during the time the cell turns by an angle  $\pi$  about  $\hat{e}_3$ , by integrating **Equation 6** over time from 0 to  $1/2f_r$ :

$$\phi_{\text{HT}} = \int_0^{\frac{1}{2f_r}} \omega_1(t) dt = \frac{\tau}{\zeta_r} \frac{2b_o}{a} \frac{1}{\pi f_r}$$

If we substitute for  $\tau$  then we have

$$\phi_{\text{HT}} = \frac{4}{3\pi} \frac{\zeta_{\perp}}{\zeta_r} \frac{f_b}{f_r} L^2 b_o \quad (17)$$

## 609 Appendix 2

### 610 Derivation of mathematical model

611 The mathematical model is derived from a system of five nonlinear ordinary differential  
 612 equations (ODEs) following a series of simplifications and approximations. The first simplifi-  
 613 cation is regarding the photoresponse time delay  $t_d$ , as mentioned in the main text. We know  
 614 from solving the equations numerically that including the time delay into the mathematical  
 615 model is equivalent to omitting it, but with the eyespot vector  $\hat{\delta}$  lying on the  $(\hat{e}_2\hat{e}_3)$  plane,  
 616 i.e.  $\hat{\delta} = \hat{e}_2$  (**Figure 1a**).

More specifically, the dynamics of the photoresponse (described by **Equation 1a** and  
**Equation 1b**) are coupled to the Euler angle dynamics via the light intensity relation  $-\hat{l} \cdot \hat{\delta} =$   
 $-s_o (\sin \psi \cos \phi + \cos \theta \sin \phi \cos \psi)$ , where  $\hat{l} = -\hat{e}_x$  (**Figure 6a**), and the equations describing  
the Euler angle dynamics (**Symon, 1971**) are coupled to the photoresponse via the relation  
 $\omega_1 = -(1/\zeta)p$ , where  $\zeta$  is a time scale constant equal to an effective viscosity. This gives the  
following system of ODEs:

$$617 \dot{\phi} = -(1/\zeta) \frac{p \sin \psi}{\sin \theta}, \quad (18a)$$

$$618 \dot{\theta} = -(1/\zeta)p \cos \psi, \quad (18b)$$

$$619 \dot{\psi} = -2\pi f_r + (1/\zeta) \frac{p \sin \psi}{\sin \theta} \cos \theta, \quad (18c)$$

$$620 \dot{p} = (1/\tau_r) (-s_o \eta (\sin \psi \cos \phi + \cos \theta \sin \phi \cos \psi) H(\sin \psi \cos \phi + \cos \theta \sin \phi \cos \psi) - h - p), \quad (18d)$$

$$621 \dot{h} = (1/\tau_a) (-s_o \eta (\sin \psi \cos \phi + \cos \theta \sin \phi \cos \psi) H(\sin \psi \cos \phi + \cos \theta \sin \phi \cos \psi) - h). \quad (18e)$$

622 Using the test case where the initial direction of the cell is  $-\hat{e}_y$ , i.e. Euler angle initial  
 623 conditions  $\theta = \pi/2$  and  $\phi = 0$ , we conclude from the solution of the reorientation dynamics  
 624 that the cell maintains a trajectory on the  $(\hat{e}_x\hat{e}_y)$  plane with  $\theta$  being almost constant. With  
 625  $\theta$  being constant and  $\psi = -2\pi f_r t$  (**Figure 1**) we can reduce the number of equations in the  
 system from five to three. Additionally with the nondimensionalization of time  $\tilde{t} = \omega_r t$ , where  
 $\omega_r = 2\pi f_r$ , the equations transform to

$$626 \phi_{\tilde{t}} = (1/\omega_r \zeta) p \sin \tilde{t}, \quad (19a)$$

$$627 p_{\tilde{t}} = (1/\tau_r \omega_r) (s_o \eta (\sin \tilde{t} \cos \phi) H(\sin \tilde{t} \cos \phi) - h - p), \quad (19b)$$

$$628 h_{\tilde{t}} = (1/\tau_a \omega_r) (s_o \eta (\sin \tilde{t} \cos \phi) H(\sin \tilde{t} \cos \phi) - h). \quad (19c)$$

629 To be able to decouple  $\phi$  from  $h$  and  $p$ , we assume that it does not change significantly  
 630 during a full (or half) cell rotation, and thus we solve the equations for  $h$  and  $p$  for a given  
 631 value of  $\phi$ .

632 If we let  $\alpha = \tau_a \omega_r$ ,  $\beta = \tau_r \omega_r$ ,  $\sigma = s_o \eta$  and dropping tildes, we can rewrite the equations as  
 633 follows:

$$634 \alpha h_t + h = \sigma \sin t \cos \phi H(\sin t), \quad (20a)$$

$$635 \beta p_t + p = \sigma \sin t \cos \phi H(\sin t) - h. \quad (20b)$$

636 **Equation 20a** can be rewritten as,

$$637 \alpha h_t + h = \begin{cases} \sigma \sin t \cos \phi & \text{for } n\pi \leq t \leq (n+1)\pi, \text{ where } n \geq 0 \text{ is even} \\ 0 & \text{for } n\pi \leq t \leq (n+1)\pi, \text{ where } n \geq 1 \text{ is odd} \end{cases}$$

648  
649  
650  
651  
652  
653  
654  
655  
656  
657  
658  
659  
660  
661  
662  
663  
664  
665  
666  
667  
668  
669  
670  
671  
672  
673  
674  
675  
676  
677  
678  
679  
680  
681  
682  
683  
684  
685  
686  
687  
688  
689  
690

and it can be solved in a piecewise fashion to yield,

$$h^n = \begin{cases} K \left( \frac{1-r^{n+1}}{1-r} e^{-\frac{t-n\pi}{\alpha}} + \frac{1}{\alpha} \sin t - \cos t \right) & \text{for } n\pi \leq t \leq (n+1)\pi, \text{ where } n \geq 0 \text{ is even} \\ K \left( \frac{1-r^{n+1}}{1-r} e^{-\frac{t-n\pi}{\alpha}} \right) & \text{for } n\pi \leq t \leq (n+1)\pi, \text{ where } n \geq 0 \text{ is odd} \end{cases}$$

where

$$K = \frac{\alpha\sigma \cos \phi}{1 + \alpha^2}$$

and

$$r = e^{-\frac{\pi}{\alpha}}.$$

Likewise, **Equation 20b** can be rewritten more analytically as

$$\beta p_t + p = \begin{cases} \sigma \sin t \cos \phi - h^n & \text{for } n\pi \leq t \leq (n+1)\pi, \text{ where } n \geq 0 \text{ is even} \\ -h^n & \text{for } n\pi \leq t \leq (n+1)\pi, \text{ where } n \geq 1 \text{ is odd} \end{cases}$$

and it can be solved in a piecewise fashion as to yield,

$$p^n = \begin{cases} \Lambda_1 \frac{1-q^{n+1}}{1-q} e^{-\frac{t-n\pi}{\beta}} + \Lambda_2 \sin t + \Lambda_3 \cos t + \Lambda_4 \frac{1-r^{n+1}}{1-r} e^{-\frac{t-n\pi}{\alpha}} & \text{for } n\pi \leq t \leq (n+1)\pi, \text{ where } n \geq 0 \text{ is even} \\ \Lambda_1 \frac{1-q^{n+1}}{1-q} e^{-\frac{t-n\pi}{\beta}} + \Lambda_4 \frac{1-r^{n+1}}{1-r} e^{-\frac{t-n\pi}{\alpha}} & \text{for } n\pi \leq t \leq (n+1)\pi, \text{ where } n \geq 0 \text{ is odd} \end{cases}$$

where

$$\Lambda_1 = \frac{\alpha\beta\sigma \cos \phi}{(1 + \beta^2)(\alpha - \beta)}, \quad \Lambda_2 = \frac{\alpha(\alpha + \beta)\sigma \cos \phi}{(1 + \beta^2)(1 + \alpha^2)}, \quad \Lambda_3 = \frac{\alpha(1 - \alpha\beta)\sigma \cos \phi}{(1 + \beta^2)(1 + \alpha^2)}, \quad \Lambda_4 = \frac{\alpha^2\sigma \cos \phi}{(1 + \alpha^2)(\beta - \alpha)}$$

and

$$q = e^{-\frac{\pi}{\beta}}.$$

Since  $n$  represents the number of half-turns, where for even values it corresponds to the times where the cell's eyespot is receiving light and for odd values to the times where the cell is in the "darkness", we integrate **Equation 19a** for every value of  $n \geq 0$

$$\Phi_{n+1} - \Phi_n = \frac{1}{\omega_r \zeta} \int_{n\pi}^{(n+1)\pi} p^n \sin t dt$$

which can be written in the form of **Equation 8**, where

$$\xi_n = \frac{\sigma}{\omega_r \zeta} \left[ A(-1)^n \frac{1-q^{n+1}}{1-q} (q+1) + B(-1)^n \frac{1-r^{n+1}}{1-r} (r+1) + H(\cos n\pi) C \frac{\pi}{2} \right] \quad (21)$$

and where

$$A = \frac{\alpha\beta^3}{(1 + \beta^2)^2(\alpha - \beta)}; \quad B = \frac{\alpha^4}{(1 + \alpha^2)^2(\beta - \alpha)}; \quad C = \frac{\alpha(\alpha + \beta)}{(1 + \beta^2)(1 + \alpha^2)}.$$

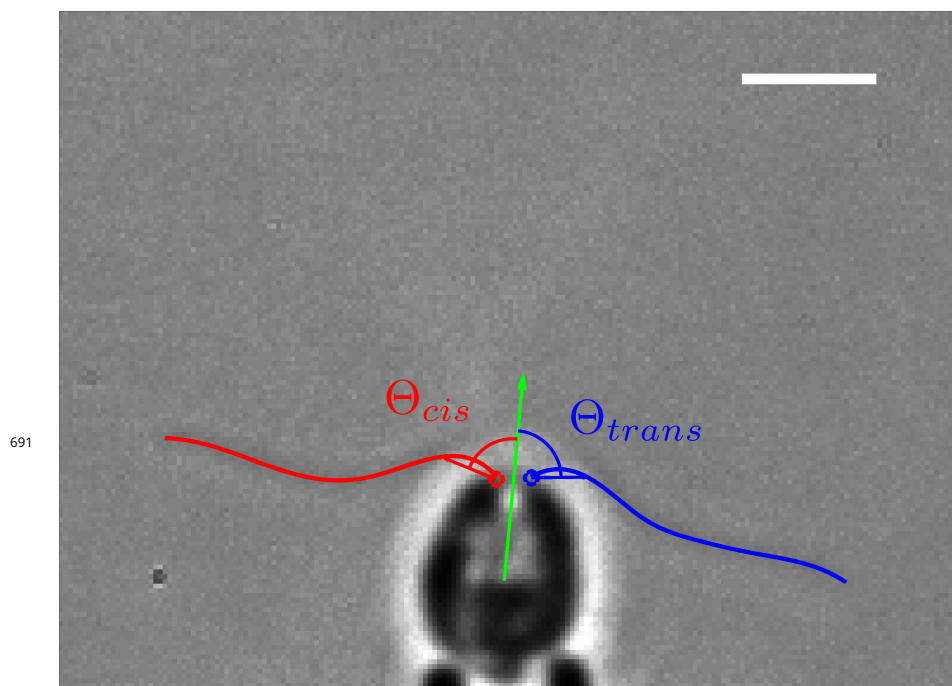

**Figure 3–Figure supplement 1. Angle used to define the beginning and the end of a beat.** A chord is drawn from the base of each flagellum to a point of fixed length on the flagellum. The angles  $\Theta_{cis}$  and  $\Theta_{trans}$  between each of the chords (red for *cis* and blue for *trans* respectively) and the axis of symmetry of the cell (green), were used to define the duration of the flagellar beats. Scale bar is  $5\mu\text{m}$ .

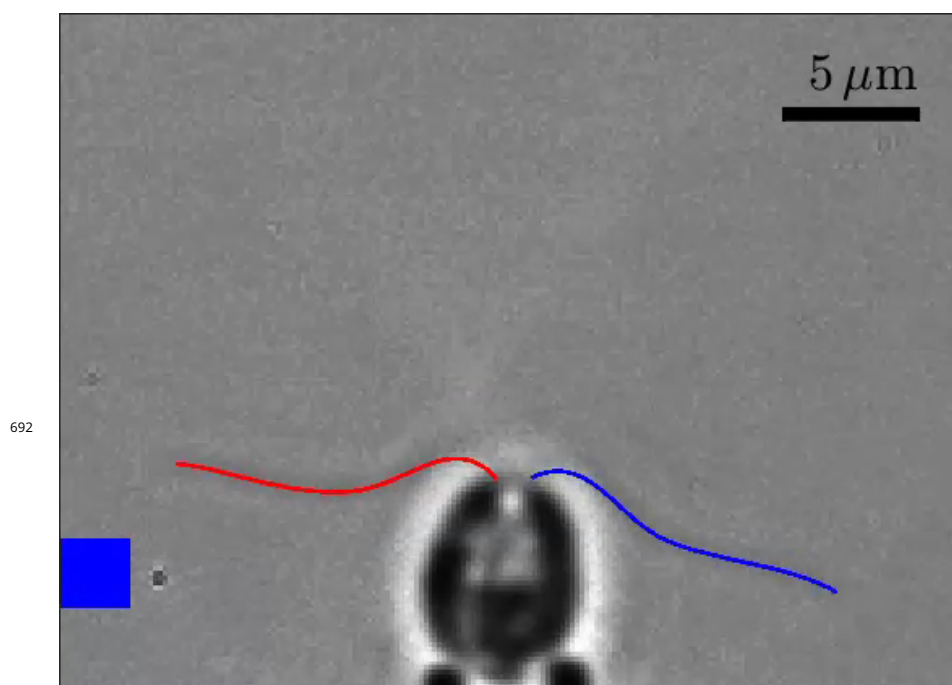

**Figure 3–Figure supplement 2. Video showing flagellar photoresponse of immobilized cells upon step-up light stimulation.** The optical fiber is illustrated as a grey square that turns blue when stimulus light is turned on. The curves fitted to the *cis* and *trans* flagella are shown in red and blue respectively.

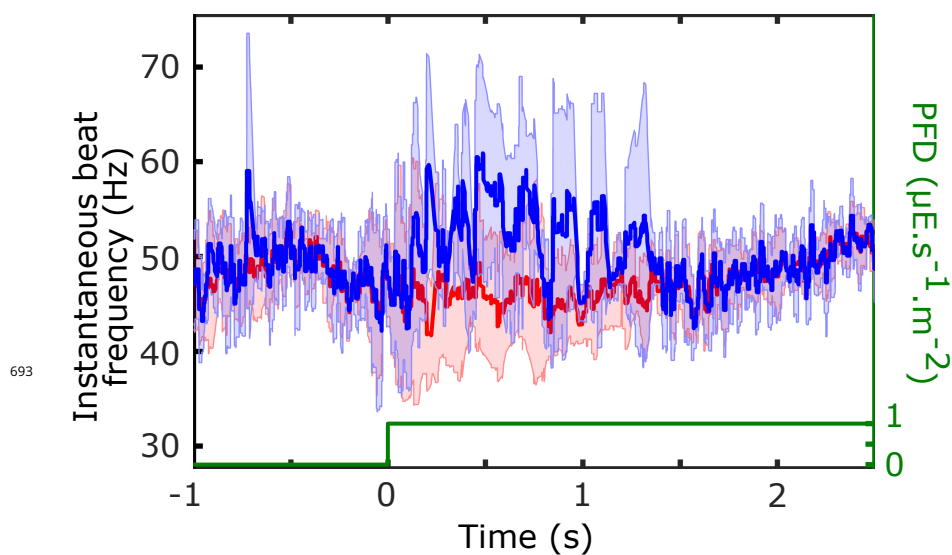

**Figure 3-Figure supplement 3. Beat frequency flagellar photoresponse.** The beat frequency response for the same cell as shown in **Figure 3c** averaged over  $n_{\text{tech}} = 4$  movies. The instantaneous beat frequency was calculated for each beat, ignoring beats that were out of synchrony. The mean and standard deviations of the instantaneous frequencies of the *cis* and *trans* flagella are shown in red and blue respectively.

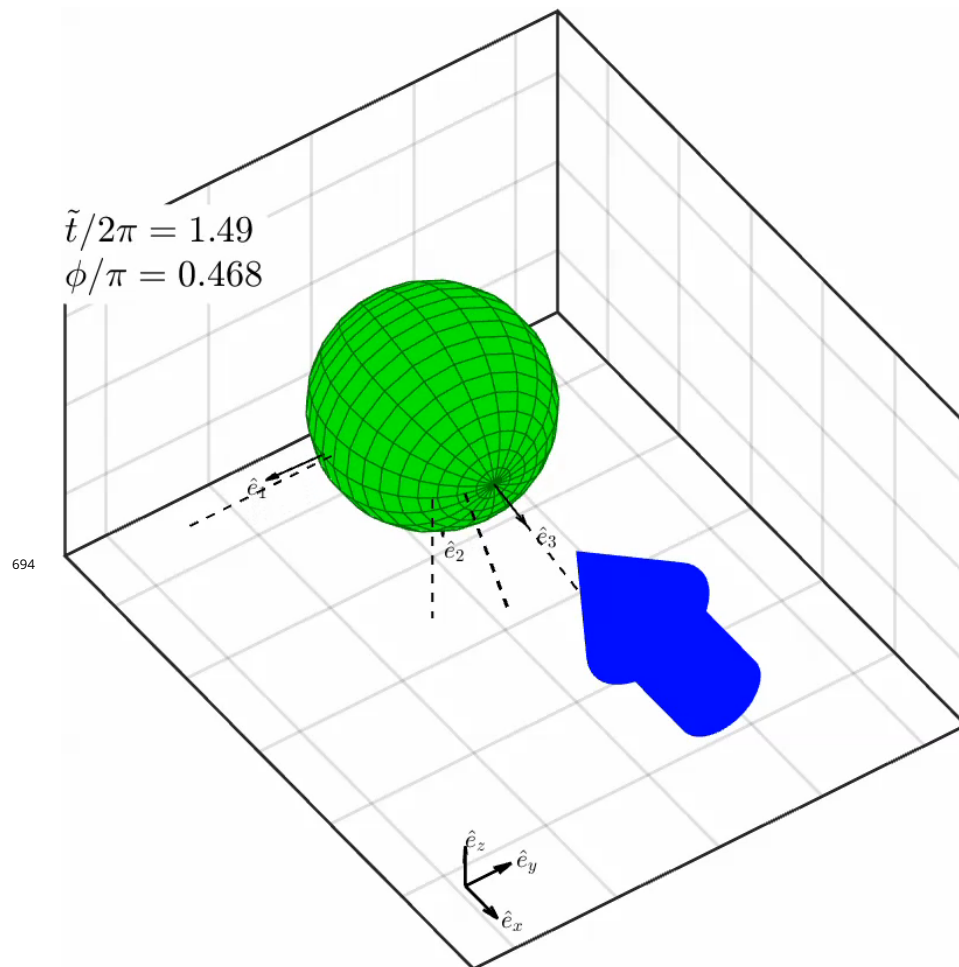

**Figure 5-Figure supplement 1. Animation of a solution of an iterated map.** Video animation of the reorientation dynamics – to  $\Phi_n = \pi/2$  – as shown in **Figure 5** for the cell with  $\Phi_0 = 0$ . The position of the vector  $\hat{e}_3$  is marked with a dashed line for every half turn. Time is displayed in numbers of full turns ( $\tilde{t}/2\pi$ ) and the interpolated Euler angle  $\phi$  is shown in units of  $\pi$  radians.



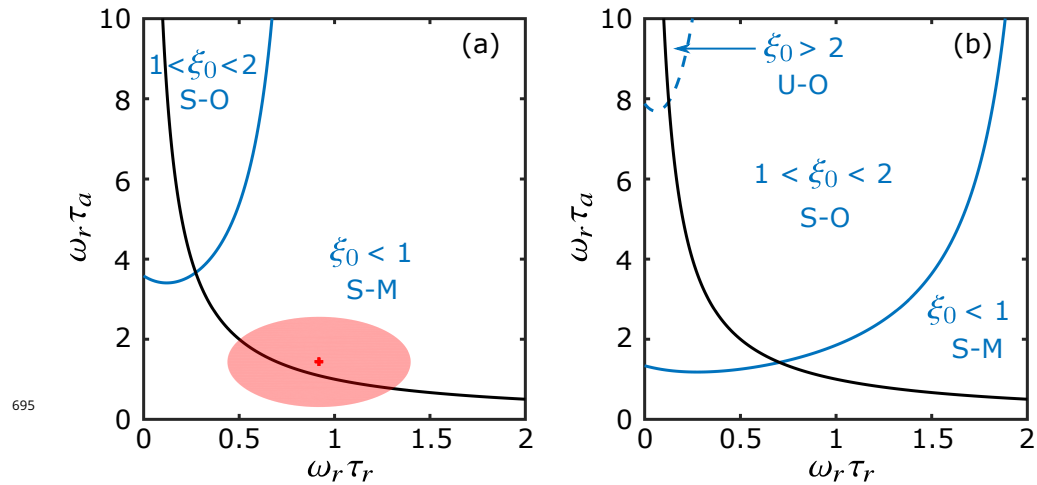

**Figure 5-Figure supplement 2. Phase diagram of the dynamics as defined by the values  $\xi_0$ .** The values of  $\xi_0$ , which are plotted as a function of  $\omega_r\tau_r$  and  $\omega_r\tau_a$ , determine the behavior of the iterated map. Numerically-calculated boundaries where  $\xi_0 = 1$  and  $\xi_0 = 2$  are shown in solid and dashed blue lines respectively. The two phase diagrams presented were generated using two different values of  $\sigma/\zeta$ :  $9 \text{ s}^{-1}$  (a) and  $15 \text{ s}^{-1}$  (b). Regions are labeled as S-M for stable monotonic, S-O for stable oscillatory and U-O for unstable oscillatory. The optimal (rescaled)  $\tau_r, \tau_a$  pairs – for immobilized cells – are shown as the black line  $\omega_r\tau_a = 1/(\omega_r\tau_r)$ . Red cross and orange ellipse in (a) summarize the mean and standard deviation of the experimental data on  $\tau_r, \tau_a$  pairs and  $f_r$  shown respectively in **Figure 6c** and **Figure 6-Figure Supplement 2a**.

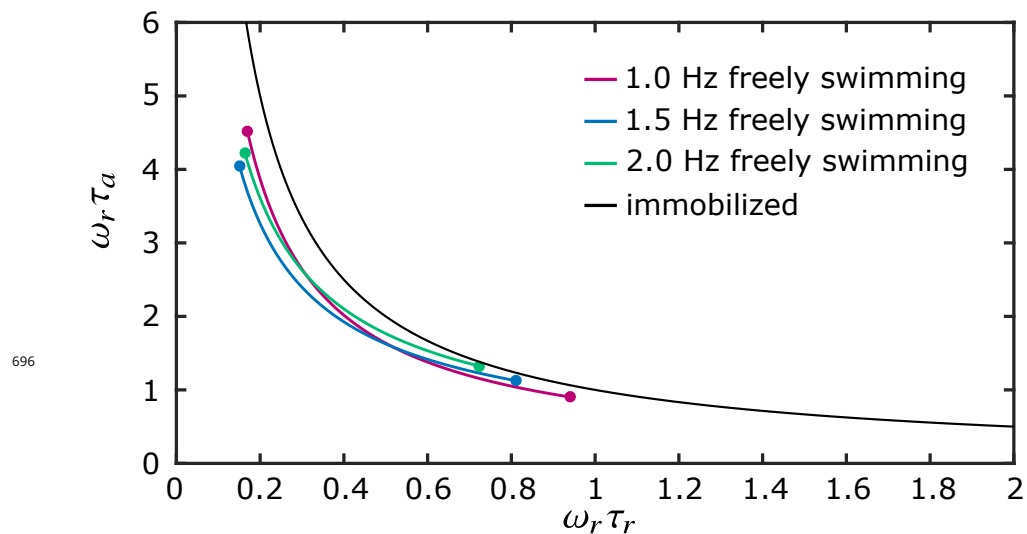

**Figure 5-Figure supplement 3. Optimal  $\tau_r, \tau_a$  pairs extracted from the 3D reorientation model** The optimal (rescaled)  $\tau_r, \tau_a$  pairs as extracted from the 3D reorientation model when  $\langle \xi \rangle = (\xi_0 + \xi_1)/2$  is at a maximum for a given  $f_r$  and  $\sigma/\zeta$ . The locus of these points is illustrated with three different fitted line segments which correspond to different values of  $f_r$ . The optimal rescaled  $\tau_r, \tau_a$  pairs – for immobilized cells – are shown as the black line  $\omega_r\tau_a = 1/(\omega_r\tau_r)$ .

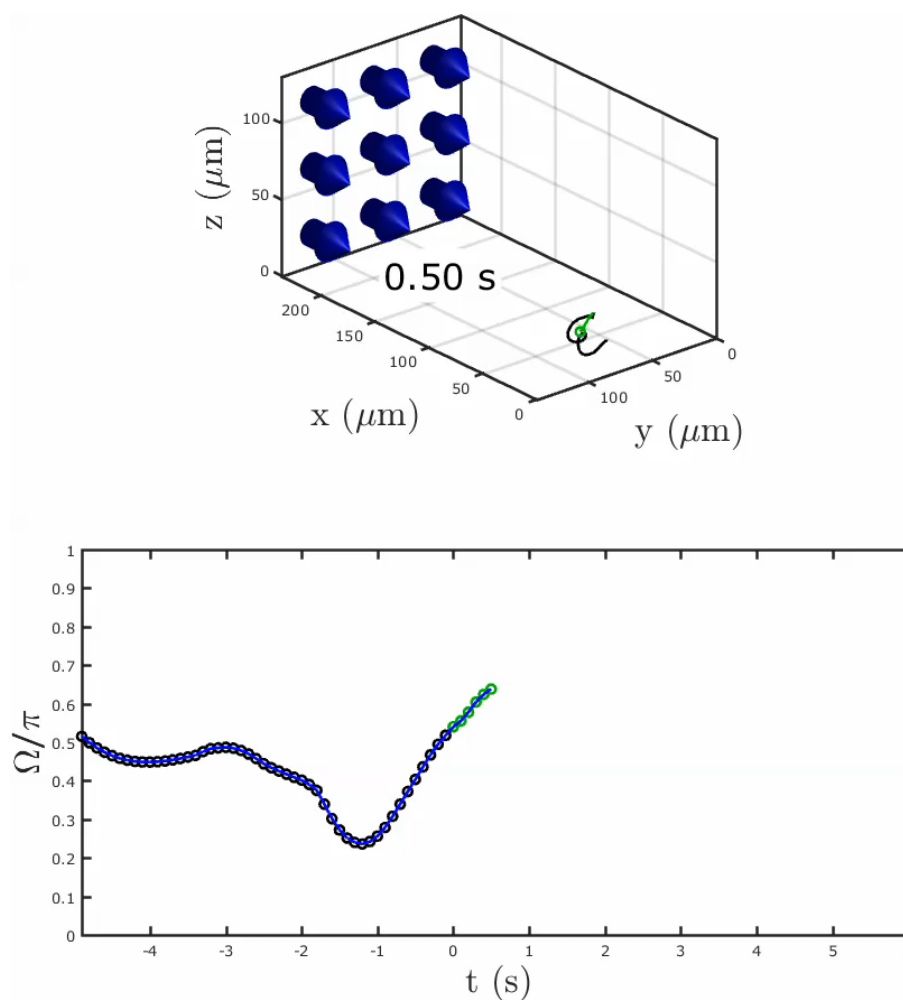

697

**Figure 6-Figure supplement 1. Video of a phototactic swimmer with angle of reorientation.** The U-turn of a phototactic swimmer shown in a video with the angle of reorientation plotted below in real time. The colors of the points on the trajectory of the cell before (black) and after (green) the light is on ( $t = 0$ ) are reflected in the color of the markers on the plot below.

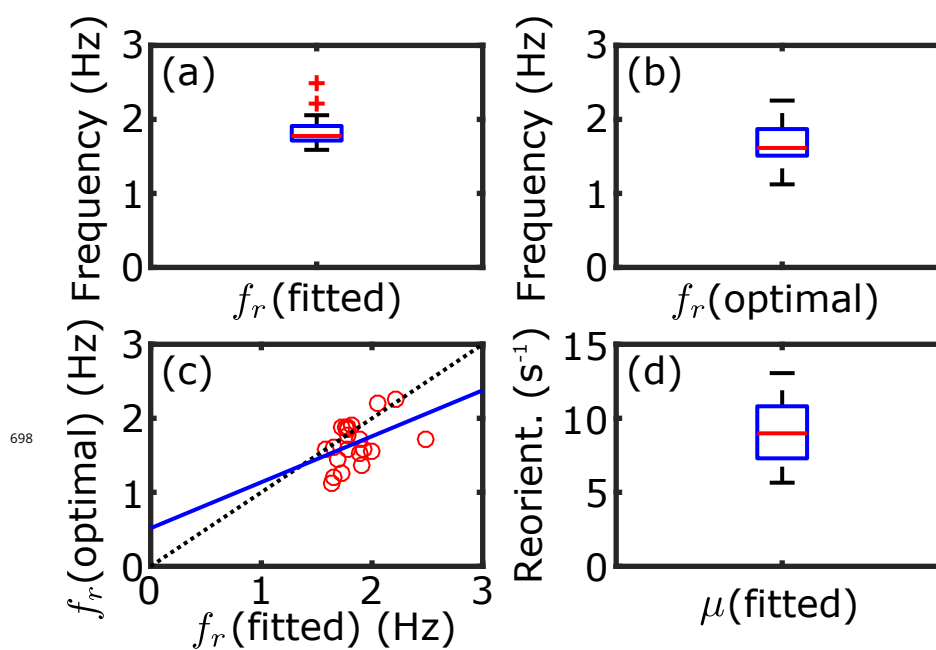

**Figure 6-Figure supplement 2. Fitting parameter statistics.** (a) Distribution of the fitted rotational frequency with median = 1.78 Hz ( $n = 21$ ). (b) Distribution of the optimal rotational frequency, as defined by **Equation 3** and using the fitted  $\tau_r$  and  $\tau_a$  pairs as shown in **Figure 6c**, with median = 1.61 Hz ( $n = 21$ ). (c) Linear correlation between fitted  $f_r$  (from (a)) and optimal  $f_r$  (from (b)), shown as a fitted straight line (blue) of the form  $f_r^{\text{opt}} = 0.62 f_r^{\text{fit}} + 0.52$ . (d) Distribution of the fitted reorientation constant  $\mu$  with median = 8.98  $\text{s}^{-1}$  ( $n = 21$ ).
